# Supplementary material for: Homeobox B5 promotes metastasis and poor prognosis in Hepatocellular Carcinoma, via FGFR4 and CXCL1 upregulation
Source: PubMed Central journal article supplement (PMC8058721; doi:10.7150/thno.57659), 2021-03-31
Supplement: thnov11p5759s1.pdf [file thnov11p5759s1.pdf]

## **Supplementary materials**

### **Materials and Methods**

#### **Cell culture**

Immortalized liver cell lines (HL-7702), HCC cells Huh6 and Hepa1-6 were purchased from the Institute of Biochemistry and Cell Biology, Chinese Academy of Science, China. Human HCC cells (HepG2, Huh-7, Hep3B, PLC/PRF/5, SNU423, SNU398, SNU387 and SNU878) were purchased from the American Type Culture Collection. Additional human HCC cells (MHCC97H, HCCLM3, and HCCLM6) were kindly provided by Dr. Tang ZY (Liver Cancer Institute, Zhongshan Hospital, Fudan University, Shanghai, China). Cells were cultured in Dulbecco's Modified Eagle Medium (DMEM) at 37°C in a 5% CO<sub>2</sub> incubator. The medium was supplemented with 10% FBS, 100µg/ml penicillin, and 100µg/ml streptomycin. These above cell lines were authenticated by short tandem repeats (STRs) DNA profiling. All cells were tested for mycoplasma contamination before use with the Universal Mycoplasma Detection Kit (ATCC 30-1012K) and were not contaminated by mycoplasma.

#### **Patients and follow-up**

This study was approved by the Ethics Committee of Tongji Medical College. All patients provided full consent for the study. Cohort I included 220 adult patients with HCC who underwent curative resection between 2003 and 2005 at the Tongji Hospital of Tongji Medical College (Wuhan, China). Cohort II included 190 adult patients with

HCC who underwent curative resection between 2006 and 2008 at the Tongji Hospital of Tongji Medical College (Wuhan, China). A preoperative clinical diagnosis of HCC was based on the diagnostic criteria of the American Association for the Study of Liver Diseases. The inclusion criteria were as follows: (a) distinctive pathologic diagnosis; (b) no preoperative anticancer treatment or distant metastases; (c) curative liver resection; and (d) complete clinicopathologic and follow-up data. The differentiation statuses were graded according to the method of Edmondson and Steine. The pTNM classification for HCC was based on The American Joint Committee on Cancer/International Union Against Cancer staging system (6th edition, 2002). Follow-up data were summarized at the end of December 2013 (Cohort I) and December 2016 (Cohort II, range 4-96 months) respectively. The patients were evaluated every 2-3 months during the first 2 years and every 3-6 months thereafter. All follow-up examinations were performed by physicians who were blinded to the study. During each check-up, the patients were monitored for tumor recurrence by measuring the serum AFP levels and by performing abdominal ultrasound examinations. A computed tomography and/or magnetic resonance imaging examination was performed every 3-6 months, together with a chest radiographic examination. The diagnostic criteria for HCC recurrence were the same as the preoperative criteria. The time to recurrence and overall survival were the primary endpoints. The time to recurrence was calculated from the date of resection to the date of a diagnosis with tumor recurrence. The overall survival was calculated from the date of resection to the date of death or of the last follow-up.

In addition, 10 normal liver tissues, 50 pairs of fresh HCC tissues and adjacent nontumor tissue samples and 30 pairs of fresh metastatic and matched primary HCC tissues and adjacent nontumor tissue samples were collected after surgical resection and were used to detect the mRNA levels of HOXB5.

## **Reagents**

PI3K inhibitor LY294002, ERK inhibitor SCH772984, JNK inhibitor SP600125, PKC inhibitor GO6983, mTOR Rapamycin, STAT3 inhibitor WP1066, BLU-5543 and SB265610 were purchased from MedChemExpress. All the reagents were used according to the manufacturer's instruction.

## **Plasmid construction**

Plasmid construction was performed according to standard procedures as outlined in our previous study[1]. The primers are presented in Supplementary Table S9. For example, the FGFR4 promoter construct, (-1781/+138) FGFR4, was generated from human genomic DNA. This construct corresponded to the sequence from -1781/+138 from the 5'-flanking region of the human FGFR4 gene. It was generated with forward and reverse primers incorporating KpnI and MluI sites at the 5' and 3'-ends, respectively. The polymerase chain reaction (PCR) product was cloned into the KpnI and MluI sites of the pGL3-Basic vector (Promega). The 5'-flanking deletion constructs of the FGFR4 promoter, (-1335/+138) FGFR4 and (-765/+138) FGFR4 were similarly generated using the (-1781/+138) FGFR4 construct as the

template. The HOXB5 binding sites in the FGFR4 promoter were mutated using the QuikChange II Site-Directed Mutagenesis Kit (Stratagene). The constructs were confirmed by DNA sequencing. Other promoter constructs were cloned in the same manner.

### **Construction of lentivirus and stable cell lines**

Lentiviral vectors encoding shRNAs were generated using PLKO.1-TRC (Addgene) and designated as LV-shHOXB5, LV-shFGFR4, LV-shCXCL1 and LV-shcontrol. “LV-shcontrol” is a non-target shRNA control. The vector “pLKO.1-puro Non-Target shRNA Control Plasmid DNA” (purchased from Sigma, SHC016) contains an shRNA insert that does not target any known genes from any species. The shRNA sequences can be found in Supplementary Table S10. Lentiviral vectors encoding the human HOXB5, FGFR4, CXCL1 and FGF19 genes were constructed in pLV-puro or pLV-neo (Addgene) and designated as LV-HOXB5, LV-FGFR4, LV-CXCL1 and LV-FGF19. An empty vector was used as the negative control and was designated as LV-control. The lentivirus and cell infection were produced according to the lentiviral vector protocol recommended by Addgene. Briefly, the lentiviral plasmid and packaging plasmids pMD2. G and psPAX2 (Addgene plasmid #12259 and #12260) were transfected into HEK-293T cells with transfection reagent (Lipofectamine®3000, Thermo Fisher Scientific) and OPTI-MEM media (Invitrogen, Waltham, MA, USA). The lentiviruses were harvested twice on days 4 and 5. Viruses were filtered with a 0.45- $\mu$ m filter and stored at -80 °C. Lentiviral infection of target cells were performed

in cell culture media with puromycin or G418. Selected pools of knockdown and over-expressing cells were used for the following experiments.

### **Transient transfection**

The cells were plated at a density of  $1 \times 10^5$  cells/well in a 24-well plate. After 12-24 hours, the cells were co-transfected with 0.6 $\mu$ g of the expression vector plasmids, 0.18  $\mu$ g of the promoter reporter plasmids and 0.02 $\mu$ g of the pRL-TK plasmids using Lipofectamine 2000 (Invitrogen, USA) according to the manufacturer's instructions. After 5 h of transfection, the cells were washed and allowed to recover overnight in fresh medium supplemented with 1% FBS for 48 h. Serum-starved cells were used for the assay.

### **Western blotting analyses**

Briefly, proteins were separated by SDS-PAGE and transferred to polyvinylidene difluoride membrane. 5% BSA was used to block the nonspecific binding site for two hours in room temperature. The membranes were incubated with primary antibodies overnight at 4 °C. Western blotting of  $\beta$ -actin on the same membrane was used as a loading control. The membranes were washed with TBST for 3 times with ten minutes each and then incubated with an HRP-conjugated secondary antibody. Proteins were visualized using an Immobilon<sup>TM</sup> Western Chemiluminescent HRP substrate (Millipore, USA).

The primary antibodies used in western blotting were listed below.

| Antibodies                       | Source                            |
|----------------------------------|-----------------------------------|
| anti- $\beta$ -actin             | Proteintech, 60008-1-Ig           |
| anti-HOXB5                       | Abcam, ab229345                   |
| anti-HOXB5                       | Invitrogen, PA5-36381             |
| anti-FGFR4                       | R&D, MAB6852                      |
| anti-FGFR4                       | Proteintech Group, 11098-1-AP     |
| anti-HIF1 $\alpha$               | Abcam, ab1                        |
| anti-ERK1/2                      | Cell Signaling Technology, #9102  |
| anti-p-ERK1/2(T202/Y204)         | Cell Signaling Technology, #4370  |
| anti-JNK                         | Abcam, ab179461                   |
| anti-JNK(phosphoT183+T183+T221)) | Abcam, ab124956                   |
| anti-AKT                         | Cell signaling technology, #4685  |
| anti-pAKT (Ser-473)              | Cell signaling technology, #4060  |
| anti-PKC $\zeta$                 | Cell Signaling Technology, #9368  |
| anti-p-PKC $\zeta$ (Thr410/403)  | Cell Signaling Technology, #9378  |
| anti-p70S6K                      | Cell Signaling Technology, #2708  |
| anti-p-p70S6K(T389)              | Cell Signaling Technology, #9234  |
| anti-STAT3                       | Cell Signaling Technology, #9139  |
| anti-p-STAT3 (Tyr705)            | Cell Signaling Technology, #9145  |
| anti-FGF19                       | Cell Signaling Technology, #83348 |
| anti-FGF15                       | Abcam, ab229630                   |

## **Construction of tissue microarrays and immunohistochemistry**

HCC samples and the corresponding adjacent liver tissues were used to construct a tissue microarray (Shanghai Biochip Co., Ltd. Shanghai, China). IHC was performed on 4- $\mu$ m-thick, routinely processed paraffin-embedded sections. Briefly, the tissue sections were deparaffinized after baking at 60 °C for an hour. Endogenous peroxidase activity was blocked by 3% (vol/vol) hydrogen peroxide in methanol for 12 min and washes with phosphate-buffered saline (PBS). Then the slides were immersed in 0.01 mol/L citrate buffer solution (pH 6.0) and placed in a microwave oven for 30 min. After washed with PBS, the sections were incubated with the primary antibody diluted in PBS containing 1% (wt/vol) bovine serum albumin in 4 °C for overnight. The tissue microarrays were stained for HOXB5 (Abnova, PAB30143), CXCL1 (LifeSpan Biosciences, LS-B2843), CD11b (Abcam, ab133357), FGFR4 (R&D, MAB6852), FGF19(cell signaling technology, #83348). Negative controls were performed by replacing the primary antibody with preimmune mouse serum. After washed with PBS, the sections were treated with a peroxidase-conjugated second antibody (Santa Cruz) for 30 min at room temperature and then washed with PBS. Reaction product was visualized with diaminobenzidine for 2 min. Images were obtained under a light microscope (Olympus, Japan) equipped with a DP70 digital camera.

Analyses were performed by two independent observers who were blinded to the clinical outcome. The immunostaining intensity was scored on a scale of 0 to 3: 0 (negative), 1 (weak), 2 (medium) or 3 (strong). The percentage of positive cells was

evaluated on a scale of 0 to 4: 0 (negative), 1 (1%-25%), 2 (26%-50%), 3 (51%-75%), or 4 (76%-100%). The final immuno-activity scores were calculated by multiplying the above two scores, resulting an overall score which range from 0~12. Each case was ultimately considered “negative” if the final score ranges from 0~3, and “positive” if the final score ranges from 4~12 as described previously[1].

#### **Antibodies used in Immunofluorescence**

| Antibodies      | Source            |
|-----------------|-------------------|
| anti-CD11b      | Abcam, ab133357   |
| Anti-CD8a       | Invitrogen, 4SM15 |
| Anti-Granzyme B | R&D, AF1865       |

#### **Antibodies used in Flow Cytometric Analysis**

| Antibodies | Source                  |
|------------|-------------------------|
| anti-CD45  | BD, 559864              |
| anti-CD11b | BD, 564454              |
| anti-Gr-1  | eBioscience, 12-5931-62 |
| anti-CD3   | BD, 555275              |
| anti-CD8a  | BD, 564459              |
| 7-AAD      | Absin, abs9104          |

#### **Quantitative Real-time PCR (RT-qPCR)**

The RNeasy Plus Mini Kit (50) kit (Qiagen, Hilden, Germany) was used to extract total RNA, which was then reverse transcribed with the Advantage RT-for-PCR Kit



(Qiagen) in accordance with the manufacturer's protocols. The target sequence was amplified with real-time PCR with the SYBR Green PCR Kit (Qiagen). The cycling parameters used were 95 °C for 15 s, 55-60 °C for 15 s, and 72 °C for 15 s for 45 cycles. Melting curve analyses were performed, and Ct values were determined during the exponential amplification phase of real-time PCR. SDS 1.9.1 software (Applied Biosystems, Massachusetts, USA) was used to evaluate amplification plots. The  $2^{-\Delta\Delta Ct}$  method was used to determine relative fold changes in target gene expression in cell lines, which was normalized to expression levels in corresponding control cells (defined as 1.0). The equation used was  $2^{-\Delta\Delta Ct}$  ( $\Delta Ct = \Delta Ct^{\text{target}} - \Delta Ct^{\text{GAPDH}}$ ;  $\Delta\Delta Ct = \Delta Ct^{\text{expressing vector}} - \Delta Ct^{\text{control vector}}$ ). When calculating relative expression levels in surgically extracted HCC samples, relative fold changes in target gene expression were normalized to expression values in normal liver tissues (defined as 1.0) using the following equation:  $2^{-\Delta\Delta Ct}$  ( $\Delta\Delta Ct = \Delta Ct^{\text{tumor}} - \Delta Ct^{\text{nontumor}}$ ). All experiments were performed in duplicate. The primer sequences were listed in Supplementary Table S9.

### **Luciferase reporter assays**

Luciferase activity was detected using the Dual Luciferase Assay (Promega, USA) according to the manufacturer's instructions. The transfected cells were lysed in culture dishes and the lysates were centrifuged at maximum speed for 1 min. Relative luciferase activity was determined using a Modulus™ TD20/20 Luminometer (Turner Biosystems, USA) and the transfection efficiencies were normalized

according to the Renilla activity.

### **Enzyme-Linked Immunosorbent Assay**

CXCL1 protein in conditioned medium was detected by using the Human CXCL1/GRO alpha DuoSet ELISA Kit (DY275, R&D Systems) accordance with research paper[2].

### **The human tumor metastasis or human Cytokines & Chemokines RT<sup>2</sup> profiler PCR array**

PLC/PRF/5 cells were divided into two groups, namely PLC/PRF/5-control and PLC/PRF/5-HOXB5. Similarly, MHCC97H cells were divided into two groups, namely MHCC97H-shcontrol and MHCC97H-shHOXB5. RNA extraction, DNase treatment, and RNA cleanup were performed according to the manufacturer's protocol (Qiagen). The cDNA of each group was synthesized using the RT<sup>2</sup> First Strand Kit (Qiagen). Gene expression profiling of PLC/PRF/5-control and PLC/PRF/5- HOXB5 cells or MHCC97H-shcontrol and MHCC97H-shHOXB5 were conducted using the Human tumor metastasis RT<sup>2</sup> Profiler PCR Array and Human Cytokines & Chemokines RT<sup>2</sup> Profiler PCR Array. The cDNA synthesis reaction was mixed with 2× RT<sup>2</sup> qPCR SYBR Green Mastermix and ddH<sub>2</sub>O, and then dispensed to the PCR array 96-well plate (25 μL/well). A 2-step cycling program was performed using the Bio-Rad CFX96. Data normalization was done by correcting all Ct values based on the average Ct values of several housekeeping genes present on array. Each assay was

conducted in triplicate.

### ***In vitro* invasion and migration assay**

Transwell inserts were placed inside 24-well cell culture plates (8  $\mu\text{m}$  pore size; Corning, USA). The upper chamber was coated with 60  $\mu\text{L}$  of Matrigel (Corning, 200 mg/mL) and dried overnight at 37°C in a 5% CO<sub>2</sub> incubator for invasion assays. For the migration and invasion assays,  $5 \times 10^4$  and  $1 \times 10^5$  cells, respectively, were plated in the top chamber, and the lower chamber was filled with 500  $\mu\text{L}$  of complete medium. After incubation for 24 h, the cells on the upper surface of the membranes were removed by swabbing, and the cells on the lower surface were fixed with 4 % paraformaldehyde for 10 min and stained with 0.1% crystal violet for 15 min. The average number of cells in five fields per membrane was counted on three inserts.

### **MDSCs migration assay**

MDSCs were isolated by Myeloid-Derived Suppressor Cell Isolation Kit (Miltenyi Biotech) according to the manufacturer's instructions. MDSCs were resuspended and added to the upper chamber of 8- $\mu\text{m}$  pore Transwell inserts (Corning) for 2 h to attach to the membrane. The Transwells were then moved to 24-well plates containing 500 $\mu\text{l}$  cell conditioned medium and incubated at 37°C for 24 h. Cells were fixed in 4% paraformaldehyde and stained with 0.1% crystal violet. Migrated cells in the lower chamber were quantified using 10 random fields. Three independent experiments were performed for each assay.

### **Bioluminescent imaging of metastatic models *in vivo*.**

The *in vivo* tumor formation and metastases were monitored using the bioluminescence. For *in vivo* signal detection, D-luciferin (Perkin-Elmer) at 100 mg/kg was injected intraperitoneally into the mice. Bioluminescent images were captured using a Lago X optical imaging system Imaging System (SI Imaging). The grow rate graph was shown by GraphPad Prism 8.0 software. At the 9 weeks, the mice were sacrificed and the lungs and livers were collected for histological examination.

### **References**

1. Chen J, Du F, Dang Y, Li X, Qian M, Feng W, et al. Fibroblast Growth Factor 19-Mediated Up-regulation of SYR-Related High-Mobility Group Box 18 Promotes Hepatocellular Carcinoma Metastasis by Transactivating Fibroblast Growth Factor Receptor 4 and Fms-Related Tyrosine Kinase 4. *Hepatology*. 2020; 71: 1712-31.
2. Li YM, Liu ZY, Wang JC, Yu JM, Li ZC, Yang HJ, et al. Receptor-Interacting Protein Kinase 3 Deficiency Recruits Myeloid-Derived Suppressor Cells to Hepatocellular Carcinoma Through the Chemokine (C-X-C Motif) Ligand 1-Chemokine (C-X-C Motif) Receptor 2 Axis. *Hepatology*. 2019; 70: 1564-81.

# Supplementary figure legends

## Figure S1

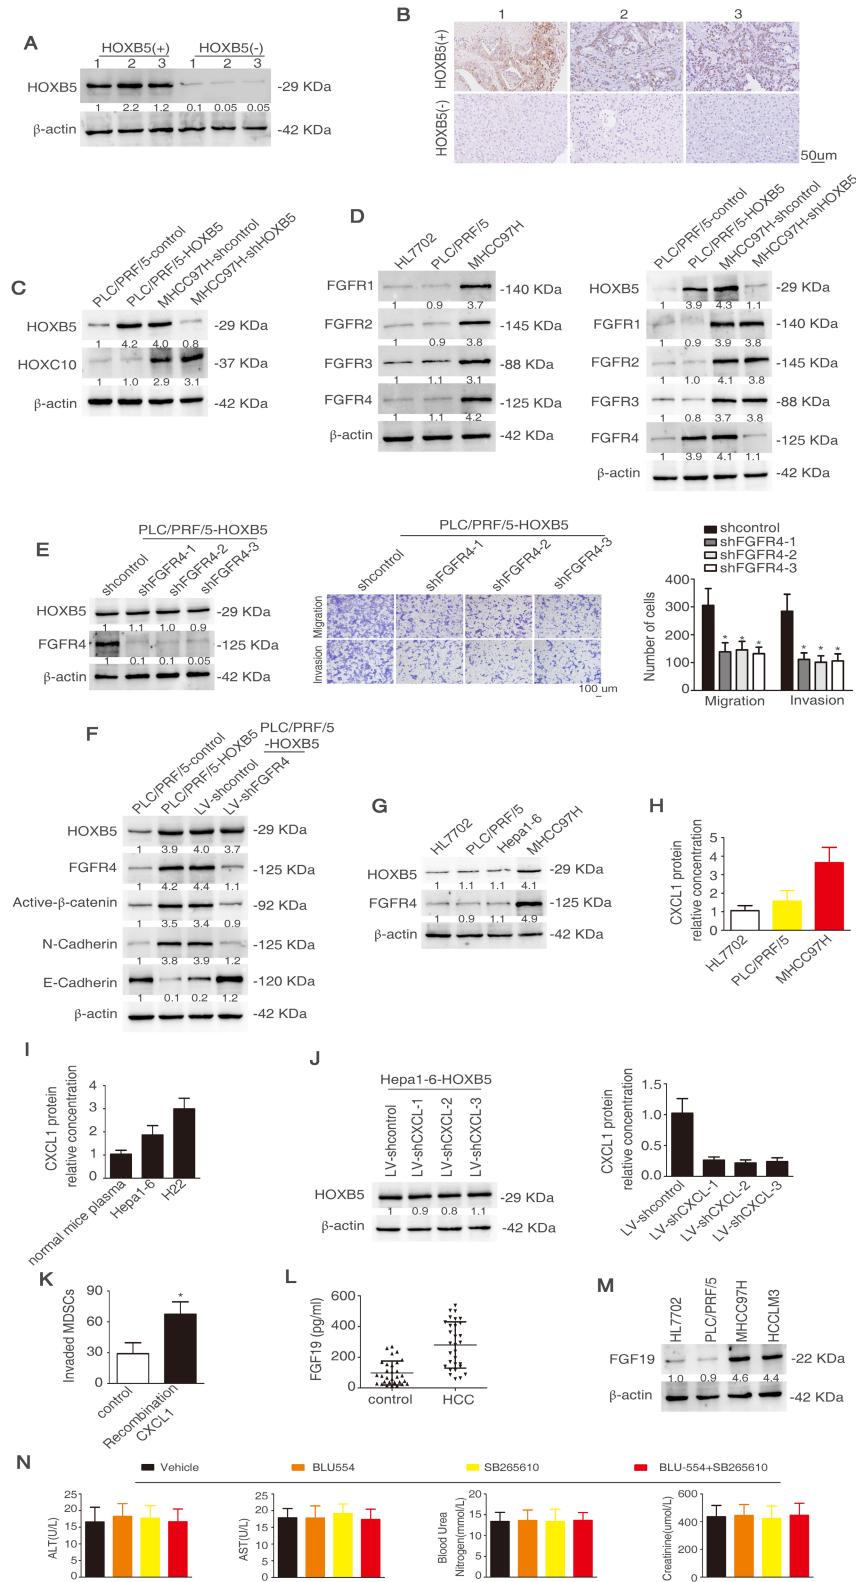

**Figure S1.** Figure legends

(A-B) Western blotting and IHC were used to show HOXB5 expression and HOXB5 staining.

(C) Western blotting showed the HOXB5 and HOXC10 expression.

(D) Western blotting was used to show HOXB5 and FGFR family expression.

(E) Western blotting showed the expression of FGFR4 when PLC/PRF/5-HOXB5 cells transfected with shFGFR4. Tanswell was used to demonstrate the role of FGFR4 on the migrative and invasive abilities of PLC/PRF/5-HOXB5 cells.

(F) Western blotting showed the active- $\beta$ -catenin and EMT expression.

(G) The expression of HOXB5 in HL7702, PLC/PRF/5, Hepa1-6 and MHCC97H.

(H) ELISA was used to show the CXCL1 expression in HL7702, PLC/PRF/5 and MHCC97H cells.

(I) ELISA was used to show the CXCL1 expression in normal mice plasm, Hepa1-6 and H22.

(J) Western blotting and ELISA were used to detect the CXCL1 expression.

(K) MSDCs treated with or without CXCL1, the migratory ability of MDSCs was shown. Bars represented the means  $\pm$  SD of 3 independent experiments.

(L) FGF19 expression in healthy donor and HCC patients.

(M) Western blotting showed the FGF19 expression in HL7702, PLC/PRF/5, MHCC97H and HCCLM3 cells.

(N) The effects of BLU554 and/or SB265610 on kidney and liver functions in mice with Hepa-1-6-HOXB5 tumors after treatment at endpoint.

**Figure S2**

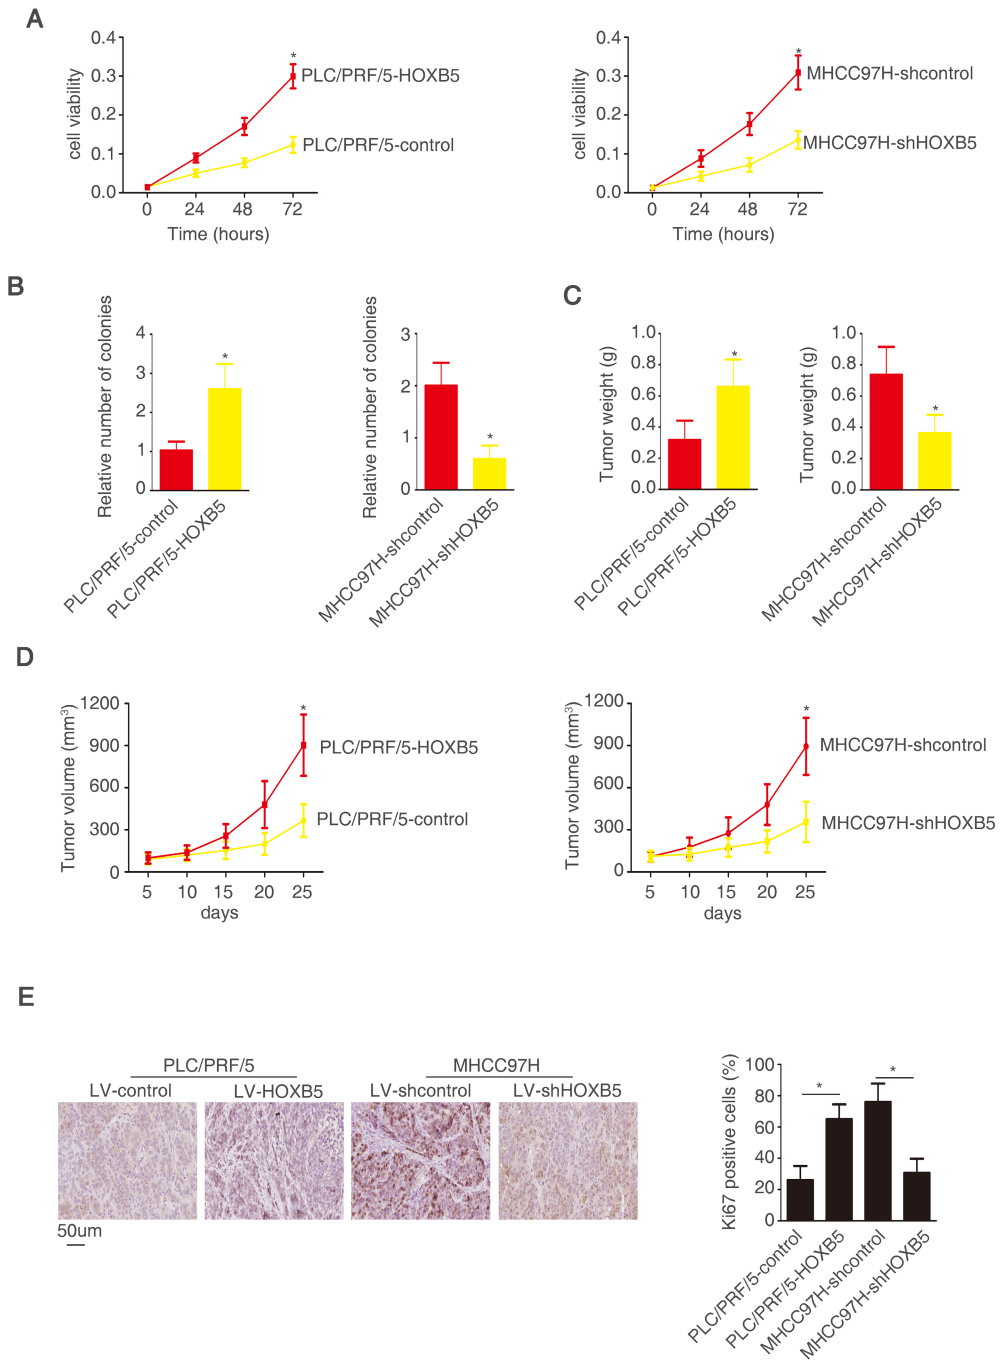

**Figure S2. HOXB5 promotes HCC proliferation.**

(A) Cell proliferation of the indicated HCC cells was assessed by a Cell Counting Kit-8 (CCK8) assay. The data were expressed as the mean  $\pm$  S.D. of three experiments.

(B) Indicated cells were subjected to colony formation assays. Five hundred cells were seeded into dishes with medium. Two weeks later, the colonies >40  $\mu\text{m}$  were counted and their numbers were compared. Statistical comparison of indicated groups was performed. The data were expressed as the mean  $\pm$  S.D. of three experiments.

(C) Tumor weight of the indicated groups were detected.

(D) Tumor growth of the indicated HCC cells was investigated by subcutaneous xenograft tumor models. Each experimental group contained 10 nude mice. Data shown the growth curves of tumors in the indicated groups.

(E) Representative Ki67 staining images of tumors from different groups. Scale bars represented 100 $\mu\text{m}$ . The percentage of Ki67-positive cells in the indicated tumors was shown.



**Figure S3**

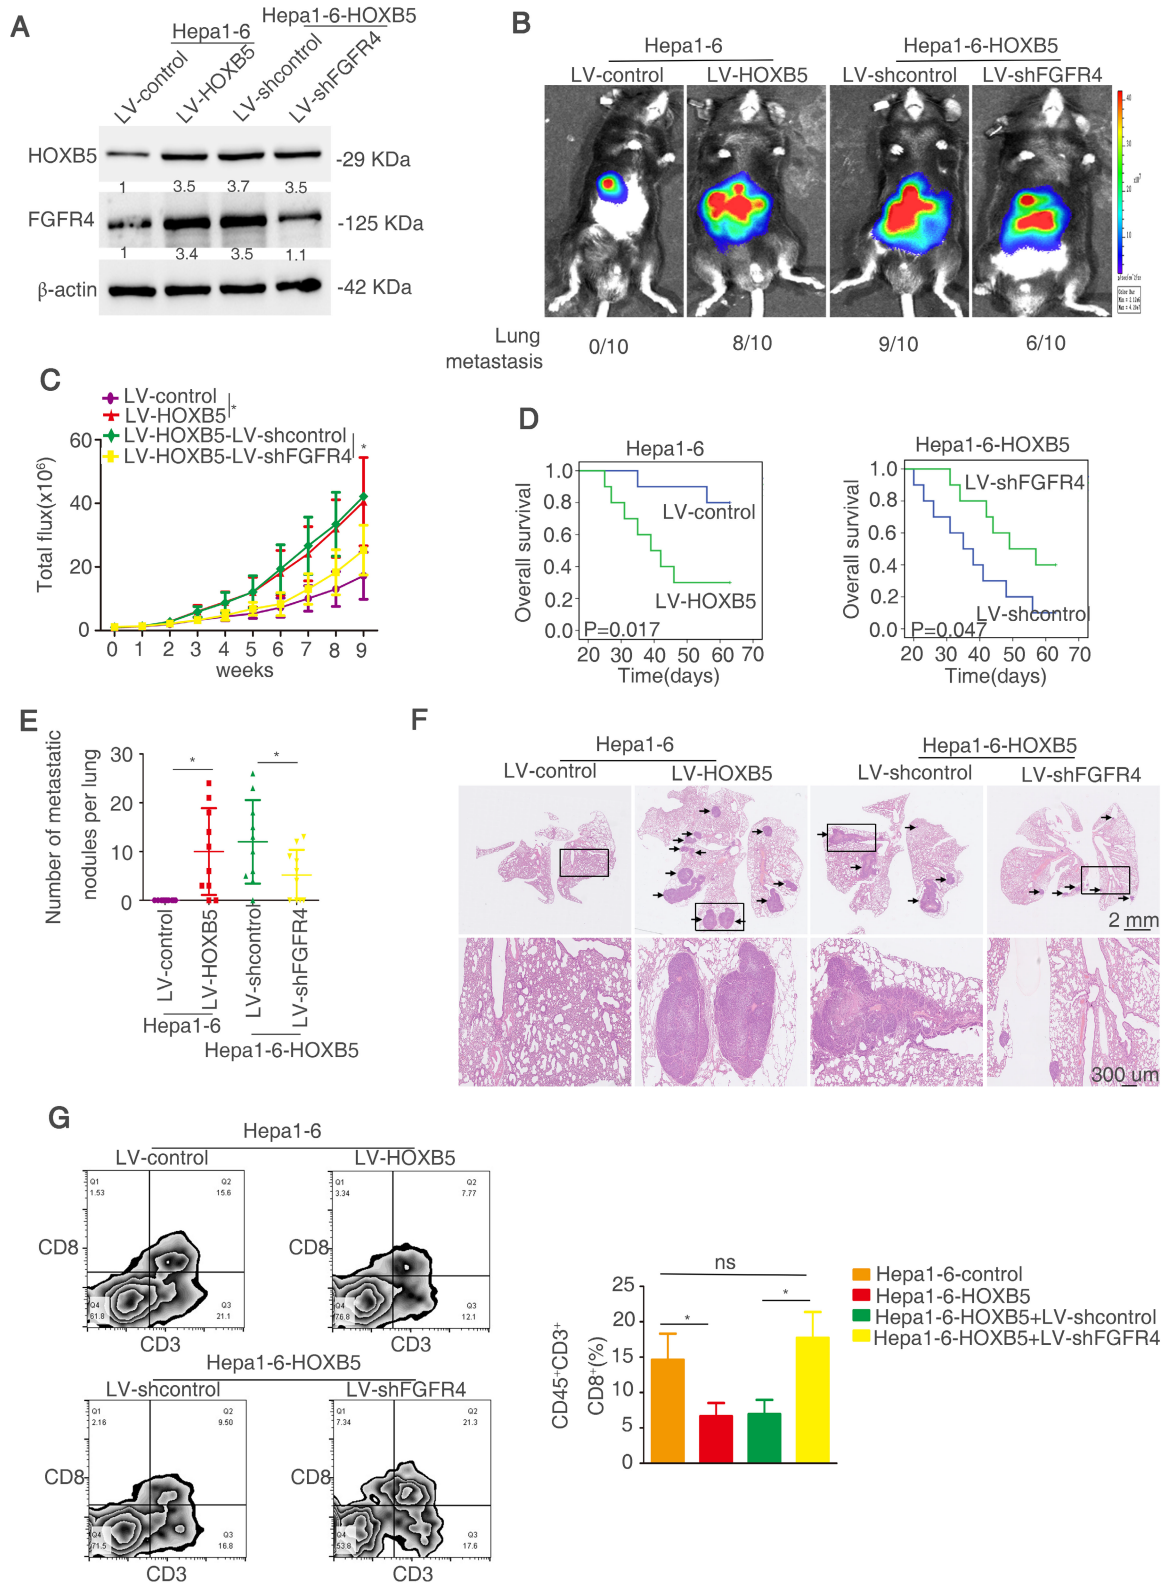

**Figure S3. Knockdown of FGFR4 partially inhibits HOXB5-promoted HCC**

**metastasis in immunocompetent mice.**

(A) Western blotting was used to analyze the protein expression of HOXB5 and FGFR4 in indicated HCC cells.

(B-F) In vivo assays showed the function of FGFR4 in HOXB5-promoted HCC metastasis in immunocompetent mice. (B-C) The C57BL/6 mice were implanted with the indicated cells in the liver. Representative bioluminescent images, growth rate and lung metastasis rate in the different groups were shown. (D) Overall survival time of the treated C56BL/6 mice in different groups was shown. (E) the metastatic nodules were counted. (F) Representative HE staining images of lung metastatic nodules in different groups were shown.

(G) CD8<sup>+</sup>T cells were analyzed by flow cytometry.

**Figure S4**

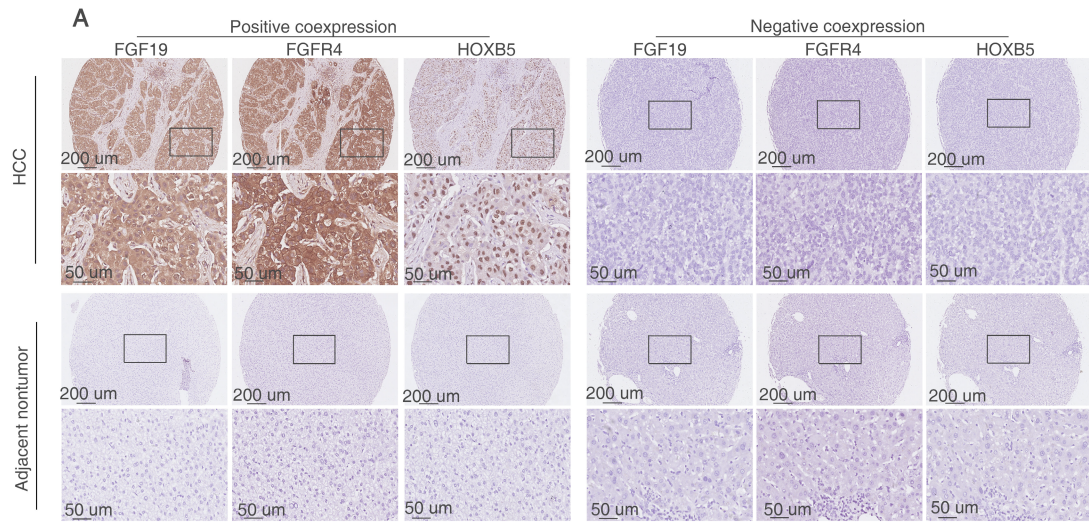

**B** Correlation analysis of HOXB5 and FGF19 or FGFR4 expression in cohort I (220) HCC tissues

|       |                 | HOXB5            |                | P value |
|-------|-----------------|------------------|----------------|---------|
|       |                 | positive (n=108) | negative (112) |         |
| FGF19 | positive(n=111) | 64               | 47             | 0.011   |
|       | negative(109)   | 44               | 65             |         |
| FGFR4 | positive(n=117) | 68               | 49             | 0.005   |
|       | negative(n=103) | 40               | 63             |         |

**C** Correlation analysis of HOXB5 and FGF19 or FGFR4 expression in cohort II (190) HCC tissues

|       |                 | HOXB5           |                 | P value |
|-------|-----------------|-----------------|-----------------|---------|
|       |                 | positive (n=96) | negative (n=94) |         |
| FGF19 | positive(n=98)  | 60              | 38              | 0.004   |
|       | negative(n=92)  | 36              | 56              |         |
| FGFR4 | positive(n=100) | 61              | 39              | 0.004   |
|       | negative(90)    | 35              | 55              |         |

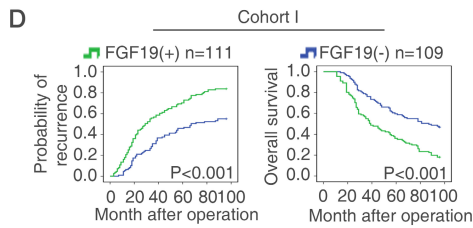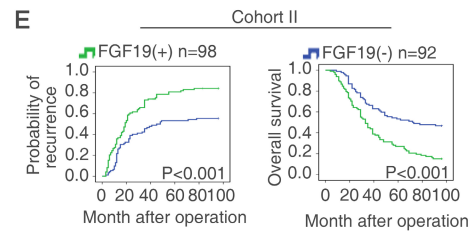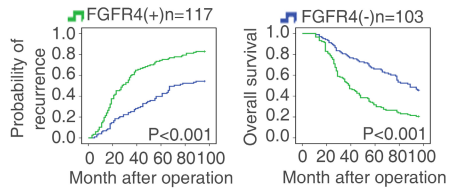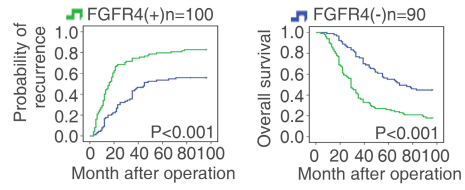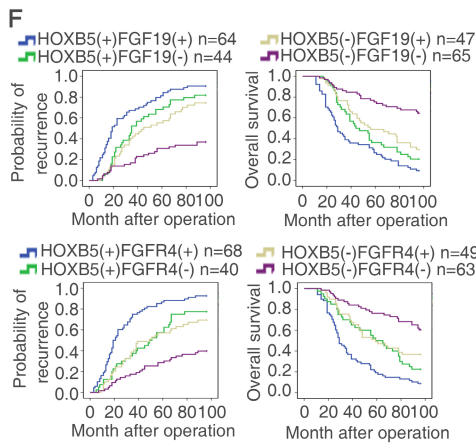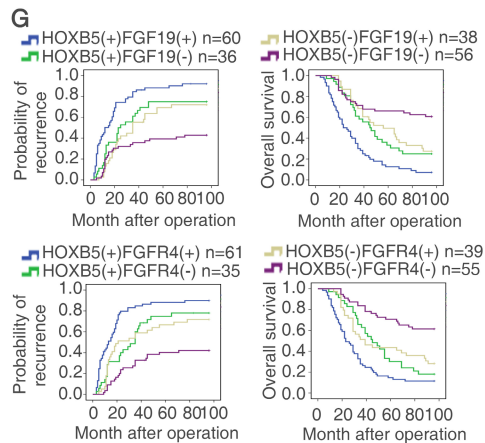

**Figure S4. HOXB5 expression is positively correlated with FGF19 and FGFR4 expression in human HCC tissues.**

(A) Representative IHC staining images showed FGF19, FGFR4 and HOXB5 expression in human HCC tissues.

(B-C) The correlation analysis of the expression of HOXB5 and FGF19 or HOXB5 and FGFR4 in human HCC tissues in cohort I (B) and cohort II (C).

(D-E) Overall survival time and probability of recurrence in HCC patients with positive or negative expression of FGF19 or FGFR4 in cohort I (D) and cohort II (E) were shown.

(F-G) Kaplan-Meier analyzed recurrence and overall survival time of patients with co-expression of FGF19/HOXB5 or FGFR4/HOXB5 in cohort I (F) and cohort II (G).

**FigureS5.**

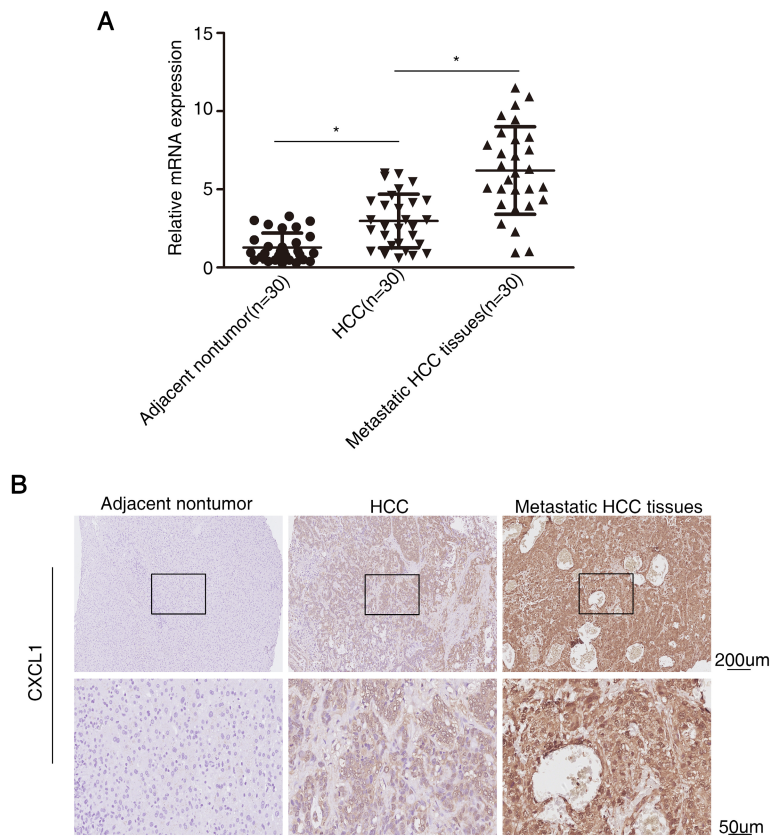

FigureS5: CXCL1 is upregulated in metastatic HCC tissues.

RT-qPCR (A) and IHC staining (B) showed CXCL1 expression in adjacent nontumor, HCC and Metastatic HCC tissues.

**FigureS6**

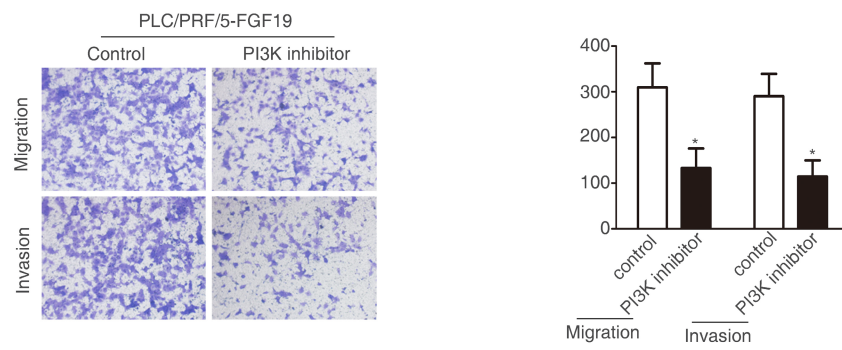

FigureS6: Transwell was used to demonstrate that PI3K inhibitor treatment inhibited the migratory and invasive abilities of PLC/PRF/5-FGF19 cells.

Table S1. Correlation between HOXB5 expression and clinicopathological characteristics of HCCs in two independent cohorts of human HCC tissues

| Clinicopathological variables | Cohort I               |                     |                   | Cohort II              |                    |                   |        |
|-------------------------------|------------------------|---------------------|-------------------|------------------------|--------------------|-------------------|--------|
|                               | Tumor HOXB5 expression |                     | <i>P</i><br>Value | Tumor HOXB5 expression |                    | <i>P</i><br>Value |        |
|                               | Negative<br>(n=112)    | Positive<br>(n=108) |                   | Negative<br>(n=94)     | Positive<br>(n=96) |                   |        |
| Age                           | 52.76(11.864)          | 51.01(12.666)       | 0.389             | 51.20(8.606)           | 50.65(7.654)       | 0.355             |        |
| Sex                           | female                 | 25                  | 15                | 0.118                  | 15                 | 16                | 1.000  |
|                               | male                   | 87                  | 93                |                        | 79                 | 80                |        |
| Serum AFP                     | ≤20ng/ml               | 31                  | 18                | 0.054                  | 21                 | 22                | 1.000  |
|                               | >20ng/ml               | 81                  | 90                |                        | 73                 | 74                |        |
| Virus infection               | HBV                    | 82                  | 76                | 0.379                  | 69                 | 72                | 0.797  |
|                               | HCV                    | 12                  | 13                |                        | 11                 | 8                 |        |
|                               | HBV+HCV                | 3                   | 8                 |                        | 3                  | 5                 |        |
|                               | none                   | 15                  | 11                |                        | 11                 | 11                |        |
| Cirrhosis                     | absent                 | 24                  | 35                | 0.070                  | 17                 | 25                | 0.222  |
|                               | present                | 88                  | 73                |                        | 77                 | 71                |        |
| Child-pugh score              | Class A                | 85                  | 80                | 0.758                  | 79                 | 79                | 0.847  |
|                               | Class B                | 27                  | 28                |                        | 15                 | 17                |        |
| Tumor number                  | single                 | 65                  | 56                | 0.416                  | 66                 | 48                | 0.005  |
|                               | multiple               | 47                  | 52                |                        | 28                 | 48                |        |
| Maximal tumor size            | ≤5cm                   | 53                  | 30                | 0.003                  | 59                 | 48                | 0.081  |
|                               | >5cm                   | 59                  | 78                |                        | 35                 | 48                |        |
| Tumor encapsulation           | absent                 | 39                  | 60                | 0.003                  | 17                 | 48                | <0.001 |
|                               | present                | 73                  | 48                |                        | 77                 | 48                |        |
| Microvascular invasion        | absent                 | 77                  | 44                | <0.001                 | 73                 | 30                | <0.001 |
|                               | present                | 35                  | 64                |                        | 21                 | 66                |        |
| Tumor differentiation         | I-II                   | 97                  | 74                | 0.002                  | 80                 | 53                | <0.001 |
|                               | III-IV                 | 15                  | 34                |                        | 14                 | 43                |        |
| TNM stage                     | I-II                   | 92                  | 62                | <0.001                 | 84                 | 53                | <0.001 |
|                               | III                    | 20                  | 46                |                        | 10                 | 43                |        |

Table S2. Univariate and multivariate analysis of factors associated with survival and recurrence in two independent cohorts of human HCC

| Clinical Variables                              | Time To Recurrence |           | Overall Survival   |           |
|-------------------------------------------------|--------------------|-----------|--------------------|-----------|
|                                                 | HR( 95% CI )       | P value   | HR(95% CI)         | P value   |
| <b>Cohort I(n=220)</b>                          |                    |           |                    |           |
| <b>Univariate analysis</b>                      |                    |           |                    |           |
| Age ( $\leq 50$ versus $> 50$ )                 | 0.988(0.976-1.001) | 0.077     | 0.987(0.974-1.000) | 0.053     |
| Sex (female versus male)                        | 1.224(0.817-1.834) | 0.327     | 1.261(0.840-1.892) | 0.263     |
| Serum AFP ( $\leq 20$ versus $> 20$ ng/ml)      | 0.705(0.472-1.051) | 0.086     | 0.680(0.451-1.026) | 0.066     |
| HBV infection (no versus yes)                   | 0.615(0.267-1.416) | 0.254     | 0.655(0.284-1.506) | 0.319     |
| Cirrhosis (absent versus present)               | 1.054(0.739-1.504) | 0.771     | 1.038(0.725-1.488) | 0.838     |
| Child-pugh score (A versus B)                   | 1.201(0.826-1.745) | 0.337     | 1.259(0.859-1.847) | 0.238     |
| Tumor number (single versus multiple)           | 0.491(0.357-0.675) | $< 0.001$ | 0.460(0.333-0.637) | $< 0.001$ |
| Maximal tumor size ( $\leq 5$ cm versus $> 5$ ) | 0.661(0.472-0.925) | 0.016     | 0.654(0.463-0.922) | 0.015     |
| tumor encapsulation (present versus absent)     | 2.627(1.902-3.626) | $< 0.001$ | 2.728(1.966-3.784) | $< 0.001$ |
| Microvascular invasion (absent versus present)  | 0.386(0.279-0.533) | $< 0.001$ | 0.367(0.264-0.509) | $< 0.001$ |
| Tumor differentiation (I-II versus III-IV)      | 0.513(0.356-0.740) | $< 0.001$ | 0.481(0.333-0.695) | $< 0.001$ |
| TNM stage (I-II versus III)                     | 0.089(0.060-0.132) | $< 0.001$ | 0.082(0.055-0.123) | $< 0.001$ |
| HOXB5 expression (negative versus positive)     | 0.363(0.261-0.505) | $< 0.001$ | 0.357(0.255-0.500) | $< 0.001$ |
| <b>Multivariate analysis</b>                    |                    |           |                    |           |
| Tumor number (single versus multiple)           | 0.905(0.556-1.473) | 0.688     | 0.826(0.509-1.341) | 0.440     |
| Maximal tumor size ( $\leq 5$ cm versus $> 5$ ) | 0.773(0.524-1.141) | 0.195     | 0.792(0.532-1.178) | 0.249     |
| Tumor encapsulation (present versus absent)     | 1.437(0.921-2.241) | 0.110     | 1.354(0.864-2.120) | 0.186     |
| Microvascular invasion (absent versus present)  | 0.742(0.477-1.152) | 0.184     | 0.651(0.419-1.010) | 0.055     |
| Tumor differentiation (I-II versus III-IV)      | 1.283(0.853-1.929) | 0.231     | 1.193(0.794-1.792) | 0.396     |
| TNM stage (I-II versus III)                     | 0.112(0.065-0.194) | $< 0.001$ | 0.110(0.063-0.191) | $< 0.001$ |
| HOXB5 expression (negative versus positive)     | 0.484(0.337-0.695) | $< 0.001$ | 0.495(0.343-0.715) | $< 0.001$ |
| <b>Cohort II(n=190)</b>                         |                    |           |                    |           |
| <b>Univariate analysis</b>                      |                    |           |                    |           |



|                                                 |                    |           |                     |           |
|-------------------------------------------------|--------------------|-----------|---------------------|-----------|
| Age ( $\leq 50$ versus $> 50$ )                 | 1.002(0.981-1.023) | 0.859     | 0.998(0.977-1.019)  | 0.854     |
| Sex (female versus male)                        | 1.317(0.851-2.039) | 0.217     | 1.250(0.802-1.949)  | 0.324     |
| Serum AFP ( $\leq 20$ versus $> 20$ ng/ml)      | 1.096(0.738-1.626) | 0.650     | 1.143(0.770-1.696)  | 0.508     |
| HBV infection (no versus yes)                   | 1.170(0.425-3.222) | 0.761     | 0.995(0.361-2.739)  | 0.992     |
| Cirrhosis (absent versus present)               | 1.029(0.684-1.547) | 0.891     | 1.080(0.721-1.617)  | 0.710     |
| Child-pugh score (A versus B)                   | 0.705(0.459-1.083) | 0.111     | 0.683(0.444-1.050)  | 0.083     |
| Tumor number (single versus multiple)           | 0.442(0.313-0.625) | $< 0.001$ | 0.442(0.313-0.625)  | $< 0.001$ |
| Maximal tumor size ( $\leq 5$ cm versus $> 5$ ) | 0.544(0.386-0.766) | $< 0.001$ | 0.550(0.390-0.776)  | 0.001     |
| Tumor encapsulation (present versus absent)     | 1.987(1.401-2.819) | $< 0.001$ | 1.982(1.397-2.811)  | $< 0.001$ |
| Microvascular invasion (absent versus present)  | 0.387(0.273-0.548) | $< 0.001$ | 0.389(0.274-0.552)  | $< 0.001$ |
| Tumor differentiation (I-II versus III-IV)      | 0.229(0.159-0.330) | $< 0.001$ | 0.251(0.175-0.360)  | $< 0.001$ |
| TNM stage (I-II versus III)                     | 0.141(0.094-0.211) | $< 0.001$ | 0.136(0.091-0.203)  | $< 0.001$ |
| HOXB5 expression (negative versus positive)     | 0.394(0.277-0.562) | $< 0.001$ | 0.376(0.262-0.538)  | $< 0.001$ |
| <b>Multivariate analysis</b>                    |                    |           |                     |           |
| Tumor number (single versus multiple)           | 0.825(0.533-1.276) | 0.387     | 0.838(0.543-1.292)  | 0.423     |
| Maximal tumor size ( $\leq 5$ cm versus $> 5$ ) | 0.960(0.642-1.435) | 0.841     | 0.945(0.633-1.412)  | 0.783     |
| Tumor encapsulation (present versus absent)     | 0.962(0.630-1.469) | 0.858     | 1.006 (0.660-1.531) | 0.980     |
| Microvascular invasion (absent versus present)  | 0.817(0.510-1.311) | 0.403     | 0.887(0.548-1.435)  | 0.624     |
| Tumor differentiation (I-II versus III-IV)      | 0.546(0.332-0.897) | 0.017     | 0.664(0.404-1.093)  | 0.107     |
| TNM stage (I-II versus III)                     | 0.308(0.165-0.574) | $< 0.001$ | 0.267 (0.143-0.498) | $< 0.001$ |
| HOXB5 expression (negative versus positive)     | 0.644(0.429-0.968) | 0.034     | 0.616(0.405-0.936)  | 0.023     |

Table S3. List of genes differentially expressed in PLC/PRF/5-HOXB5 versus PLC/PRF/5-control cells using a human metastasis and Cytokines & Chemokines PCR array

| gene                            | Fold change | Description                                     |
|---------------------------------|-------------|-------------------------------------------------|
| <b>Metastasis<br/>PCR array</b> |             |                                                 |
| FGFR4                           | 6.15        | Fibroblast growth factor receptor 4             |
| CXCR2                           | 4.93        | Chemokine receptor 2                            |
| MYC                             | 4.46        | V-myc myelocytomatosis viral oncogene homolog   |
| CXCR4                           | 4.03        | Chemokine receptor 4                            |
| MMP10                           | 3.84        | Matrix metalloproteinase 10                     |
| MET                             | 3.46        | Met proto-oncogene                              |
| MTA1                            | 3.31        | Metastasis associated 1                         |
| CHD4                            | 3.17        | Chromodomain helicase DNA binding protein 4     |
| MCAM                            | 3.01        | Melanoma cell adhesion molecule                 |
| COL4A2                          | 2.72        | Collagen, type IV, alpha 2                      |
| FN1                             | 2.54        | Fibronectin 1                                   |
| FLT4                            | 2.31        | Fms-related tyrosine kinase 4                   |
| MMP7                            | 2.14        | Matrix metalloproteinase 7                      |
| CD44                            | 2.06        | CD44 molecule                                   |
| CDH6                            | 1.95        | Cadherin 6, type 2, K-cadherin                  |
| VEGFA                           | 1.83        | Vascular endothelial growth factor A            |
| CDH11                           | 1.74        | Cadherin 11, type 2, OB-cadherin                |
| ETV4                            | 1.65        | Ets variant 4                                   |
| HGF                             | 1.65        | Hepatocyte growth factor                        |
| IGF1                            | 1.57        | Insulin-like growth factor 1                    |
| IL1B                            | 1.55        | Interleukin 1, beta                             |
| MMP13                           | 1.48        | Matrix metalloproteinase 13                     |
| CCL7                            | 1.45        | Chemokine (C-C motif) ligand 7                  |
| IL18                            | 1.45        | Interleukin 18                                  |
| CTBP1                           | 1.41        | C-terminal binding protein 1                    |
| DENR                            | 1.37        | Density-regulated protein                       |
| CXCL12                          | 1.36        | Chemokine ligand 12                             |
| CTSK                            | 1.33        | Cathepsin K                                     |
| SYK                             | 1.25        | Spleen tyrosine kinase                          |
| TGFB1                           | 1.25        | Transforming growth factor, beta 1              |
| SRC                             | 1.24        | V-src sarcoma viral oncogene homolog            |
| MYCL1                           | 1.21        | V-myc myelocytomatosis viral oncogene homolog 1 |

|          |       |                                                                                 |
|----------|-------|---------------------------------------------------------------------------------|
| MMP9     | 1.20  | Matrix metalloproteinase 9                                                      |
| MMP2     | 1.15  | Matrix metalloproteinase 2                                                      |
| CTSL1    | 1.13  | Cathepsin L1                                                                    |
| EPHB2    | 1.13  | EPH receptor B2                                                                 |
| ITGA7    | 1.12  | Integrin, alpha 7                                                               |
| KRAS     | 1.10  | V-Ki-ras2 Kirsten rat sarcoma viral oncogene homolog                            |
| MMP3     | 1.08  | Matrix metalloproteinase 3                                                      |
| FAT1     | 1.07  | FAT tumor suppressor homolog 1                                                  |
| METAP2   | 1.05  | Methionyl aminopeptidase 2                                                      |
| MGAT5    | 1.05  | Mannosyl (alpha-1,6-)-glycoprotein<br>beta-1,6-N-acetyl-glucosaminyltransferase |
| SMAD2    | 1.03  | SMAD family member 2                                                            |
| TCF20    | 1.02  | Transcription factor 20                                                         |
| EWSR1    | 1.01  | Ewing sarcoma breakpoint region 1                                               |
| SMAD4    | 1.00  | SMAD family member 4                                                            |
| MMP11    | -1.01 | Matrix metalloproteinase 11                                                     |
| ITGB3    | -1.02 | Integrin, beta 3                                                                |
| SERPINE1 | -1.05 | Serpin peptidase inhibitor, clade E, member 1                                   |
| SET      | -1.09 | SET nuclear oncogene                                                            |
| TRPM1    | -1.13 | Transient receptor potential cation channel, subfamily M,<br>member 1           |
| RPSA     | -1.15 | Ribosomal protein SA                                                            |
| HRAS     | -1.22 | V-Ha-ras Harvey rat sarcoma viral oncogene homolog                              |
| PLAUR    | -1.28 | Plasminogen activator, urokinase receptor                                       |
| TSHR     | -1.28 | Thyroid stimulating hormone receptor                                            |
| PNN      | -1.31 | Pinin, desmosome associated protein                                             |
| PTEN     | -1.35 | Phosphatase and tensin homolog                                                  |
| APC      | -1.38 | Adenomatous polyposis coli                                                      |
| CD82     | -1.41 | CD82 molecule                                                                   |
| CST7     | -1.43 | Cystatin F                                                                      |
| BRMS1    | -1.46 | Breast cancer metastasis suppressor 1                                           |
| HPSE     | -1.54 | Heparanase                                                                      |
| HTATIP2  | -1.58 | HIV-1 Tat interactive protein 2                                                 |
| TP53     | -1.62 | Tumor protein p53                                                               |
| RB1      | -1.67 | Retinoblastoma 1                                                                |
| RORB     | -1.68 | RAR-related orphan receptor B                                                   |
| CDKN2A   | -1.75 | Cyclin-dependent kinase inhibitor 2A                                            |
| CTNNA1   | -1.82 | Catenin (cadherin-associated protein), alpha 1                                  |

|         |       |                                                       |
|---------|-------|-------------------------------------------------------|
| MDM2    | -1.88 | Mdm2 p53 binding protein homolog                      |
| NF2     | -1.94 | Neurofibromin 2                                       |
| NME1    | -1.95 | Non-metastatic cells 1                                |
| NR4A3   | -1.97 | Nuclear receptor subfamily 4, group A, member 3       |
| NME4    | -2.03 | Non-metastatic cells 4                                |
| TNFSF10 | -2.08 | Tumor necrosis factor (ligand) superfamily, member 10 |
| TIMP4   | -2.14 | TIMP metalloproteinase inhibitor 4                    |
| SSTR2   | -2.19 | Somatostatin receptor 2                               |
| FXYD5   | -2.29 | FXYD domain containing ion transport regulator 5      |
| KISS1R  | -2.53 | KISS1 receptor                                        |
| GNRH1   | -2.68 | Gonadotropin-releasing hormone 1                      |
| KISS1   | -2.74 | KiSS-1 metastasis-suppressor                          |
| TIMP2   | -2.93 | TIMP metalloproteinase inhibitor 2                    |
| MTSS1   | -3.16 | Metastasis suppressor 1                               |
| TIMP3   | -3.38 | TIMP metalloproteinase inhibitor 3                    |
| CDH1    | -3.67 | Cadherin 1, type 1, E-cadherin                        |

#### **Cytokines & Chemokines PCR array**

|        |      |                                          |
|--------|------|------------------------------------------|
| CXCL1  | 5.22 | Chemokine (C-X-C motif) ligand 1         |
| CSF1   | 4.36 | Colony stimulating factor 1 (macrophage) |
| CCL2   | 4.03 | Chemokine (C-C motif) ligand 2           |
| CCL5   | 3.89 | Chemokine (C-C motif) ligand 5           |
| CCL20  | 3.84 | Chemokine (C-C motif) ligand 20          |
| CXCL2  | 3.76 | Chemokine (C-X-C motif) ligand 2         |
| BMP2   | 3.62 | Bone morphogenetic protein 2             |
| CCL24  | 3.59 | Chemokine (C-C motif) ligand 24          |
| CXCL11 | 3.50 | Chemokine (C-X-C motif) ligand 11        |
| CXCL5  | 3.32 | Chemokine (C-X-C motif) ligand           |
| SPP1   | 3.06 | Secreted phosphoprotein 1                |
| IL22   | 2.83 | Interleukin 22                           |
| IL6    | 2.59 | Interleukin 6                            |
| CCL3   | 2.42 | Chemokine (C-C motif) ligand 3           |
| BMP4   | 2.25 | Bone morphogenetic protein 4             |
| CXCL13 | 2.03 | Chemokine (C-X-C motif) ligand 13        |
| IL10   | 2.02 | Interleukin 10                           |
| IL8    | 1.82 | Interleukin 8                            |
| CCL1   | 1.77 | Chemokine (C-C motif) ligand 1           |
| CCL18  | 1.72 | Chemokine (C-C motif) ligand 18          |
| CCL17  | 1.64 | Chemokine (C-C motif) ligand 17          |

|          |       |                                                        |
|----------|-------|--------------------------------------------------------|
| MIF      | 1.55  | Macrophage migration inhibitory factor                 |
| IL1B     | 1.52  | Interleukin 1, beta                                    |
| IL4      | 1.46  | Interleukin 4                                          |
| CXCL10   | 1.41  | Chemokine (C-X-C motif) ligand 10                      |
| CX3CL1   | 1.37  | Chemokine (C-X3-C motif) ligand 1                      |
| IL11     | 1.33  | Interleukin 11                                         |
| IL17A    | 1.31  | Interleukin 17A                                        |
| VEGFA    | 1.28  | Vascular endothelial growth factor A                   |
| BMP6     | 1.26  | Bone morphogenetic protein 6                           |
| CCL22    | 1.24  | Chemokine (C-C motif) ligand 22                        |
| CCL7     | 1.24  | Chemokine (C-C motif) ligand 7                         |
| CCL11    | 1.22  | Chemokine (C-C motif) ligand 11                        |
| BMP7     | 1.20  | Bone morphogenetic protein 7                           |
| CCL21    | 1.18  | Chemokine (C-C motif) ligand 21                        |
| IL17F    | 1.16  | Interleukin 17F                                        |
| IL1A     | 1.12  | Interleukin 1, alpha                                   |
| IL5      | 1.12  | Interleukin 5                                          |
| IL9      | 1.11  | Interleukin 9                                          |
| TNF      | 1.09  | Tumor necrosis factor                                  |
| LTB      | 1.07  | Lymphotoxin beta                                       |
| CXCL12   | 1.07  | Chemokine (C-X-C motif) ligand 12                      |
| CCL19    | 1.04  | Chemokine (C-C motif) ligand 19                        |
| CCL8     | 1.03  | Chemokine (C-C motif) ligand 8                         |
| CSF2     | 1.02  | Colony stimulating factor 2                            |
| IL16     | 1.01  | Interleukin 16                                         |
| C5       | 1.00  | Complement component 5                                 |
| CNTF     | -1.01 | Ciliary neurotrophic factor                            |
| CSF3     | -1.02 | Colony stimulating factor 3                            |
| CCL13    | -1.02 | Chemokine (C-C motif) ligand 13                        |
| CD40LG   | -1.04 | CD40 ligand                                            |
| ADIPOQ   | -1.07 | Adiponectin, C1Q and collagen domain containing        |
| GPI      | -1.09 | Glucose-6-phosphate isomerase                          |
| CXCL16   | -1.11 | Chemokine (C-X-C motif) ligand 16                      |
| LTA      | -1.17 | Lymphotoxin alpha                                      |
| MSTN     | -1.22 | Myostatin                                              |
| PPBP     | -1.23 | Pro-platelet basic protein                             |
| TNFSF13B | -1.28 | Tumor necrosis factor (ligand) superfamily, member 13b |
| XCL1     | -1.37 | Chemokine (C motif) ligand                             |

|           |       |                                                        |
|-----------|-------|--------------------------------------------------------|
| THPO      | -1.39 | Thrombopoietin                                         |
| LIF       | -1.43 | Leukemia inhibitory factor                             |
| IL3       | -1.48 | Interleukin 3                                          |
| FASLG     | -1.52 | Fas ligand                                             |
| IFNG      | -1.56 | Interferon, gamma                                      |
| IFNA2     | -1.59 | Interferon, alpha 2                                    |
| IL13      | -1.65 | Interleukin 13                                         |
| IL1RN     | -1.69 | Interleukin 1 receptor antagonis                       |
| IL23A     | -1.72 | Interleukin 23, alpha subunit p19                      |
| NODAL     | -1.72 | Nodal homolog                                          |
| TNFRSF11B | -1.84 | Tumor necrosis factor receptor superfamily, member 11b |
| OSM       | -1.87 | Oncostatin M                                           |
| TNFSF10   | -1.96 | Tumor necrosis factor (ligand) superfamily, member 1   |
| TNFSF11   | -2.01 | Tumor necrosis factor (ligand) superfamily, member 11  |
| IL12A     | -2.03 | Interleukin 12A                                        |
| IL18      | -2.11 | Interleukin 18                                         |
| IL12B     | -2.28 | Interleukin 12B                                        |
| IL15      | -2.42 | Interleukin 15                                         |
| IL7       | -2.76 | Interleukin 7                                          |
| TGFB2     | -2.82 | Transforming growth factor, beta 2                     |
| IL21      | -2.94 | Interleukin 21                                         |
| IL24      | -3.03 | Interleukin 24                                         |
| IL2       | -3.09 | Interleukin 2                                          |
| IL27      | -3.25 | Interleukin 27                                         |

---

Table S4. List of genes differentially expressed in MHCC97H-shHOXB5 versus MHCC97H-shcontrol cells using a human metastasis and Cytokines & Chemokines PCR array

| gene                            | Fold change | Description                                     |
|---------------------------------|-------------|-------------------------------------------------|
| <b>Metastasis<br/>PCR array</b> |             |                                                 |
| FGFR4                           | -5.64       | Fibroblast growth factor receptor 4             |
| CHD4                            | -4.77       | Chromodomain helicase DNA binding protein 4     |
| MET                             | -4.28       | Met proto-oncogene                              |
| CXCR2                           | -4.01       | Chemokine receptor 2                            |
| MMP3                            | -3.91       | Matrix metalloproteinase 3                      |
| VEGFA                           | -3.80       | Vascular endothelial growth factor A            |
| ETV4                            | -3.73       | Ets variant 4                                   |
| MYC                             | -3.51       | V-myc myelocytomatosis viral oncogene homolog   |
| MTA1                            | -3.38       | Metastasis associated 1                         |
| HGF                             | -3.02       | Hepatocyte growth factor                        |
| CCL7                            | -2.81       | Chemokine (C-C motif) ligand 7                  |
| IL1B                            | -2.54       | Interleukin 1, beta                             |
| TGFB1                           | -2.38       | Transforming growth factor, beta 1              |
| CXCL12                          | -2.29       | Chemokine ligand 12                             |
| MMP9                            | -2.13       | Matrix metalloproteinase 9                      |
| IL18                            | -2.06       | Interleukin 18                                  |
| CXCR4                           | -1.97       | Chemokine receptor 4                            |
| MCAM                            | -1.97       | Melanoma cell adhesion molecule                 |
| FLT4                            | -1.91       | Fms-related tyrosine kinase 4                   |
| FN1                             | -1.82       | Fibronectin 1                                   |
| CD44                            | -1.81       | CD44 molecule                                   |
| MMP7                            | -1.75       | Matrix metalloproteinase 7                      |
| COL4A2                          | -1.53       | Collagen, type IV, alpha 2                      |
| MMP13                           | -1.49       | Matrix metalloproteinase 13                     |
| CDH6                            | -1.46       | Cadherin 6, type 2, K-cadherin                  |
| MMP2                            | -1.46       | Matrix metalloproteinase 2                      |
| SYK                             | -1.42       | Spleen tyrosine kinase                          |
| MYCL1                           | -1.33       | V-myc myelocytomatosis viral oncogene homolog 1 |
| MMP10                           | -1.32       | Matrix metalloproteinase 10                     |
| MMP11                           | -1.31       | Matrix metalloproteinase 11                     |
| ITGA7                           | -1.25       | Integrin, alpha 7                               |
| CTSK                            | -1.24       | Cathepsin K                                     |

|          |       |                                                                              |
|----------|-------|------------------------------------------------------------------------------|
| DENR     | -1.24 | Density-regulated protein                                                    |
| SRC      | -1.22 | V-src sarcoma viral oncogene homolog                                         |
| IGF1     | -1.18 | Insulin-like growth factor 1                                                 |
| CDH11    | -1.16 | Cadherin 11, type 2, OB-cadherin                                             |
| CTBP1    | -1.16 | C-terminal binding protein 1                                                 |
| SET      | -1.14 | SET nuclear oncogene                                                         |
| TSHR     | -1.12 | Thyroid stimulating hormone receptor                                         |
| APC      | -1.11 | Adenomatous polyposis coli                                                   |
| HRAS     | -1.08 | V-Ha-ras Harvey rat sarcoma viral oncogene homolog                           |
| MDM2     | -1.07 | Mdm2 p53 binding protein homolog                                             |
| TRPM1    | -1.07 | Transient receptor potential cation channel, subfamily M, member 1           |
| CD82     | -1.05 | CD82 molecule                                                                |
| ITGB3    | -1.03 | Integrin, beta 3                                                             |
| PTEN     | -1.01 | Phosphatase and tensin homolog                                               |
| SMAD2    | 1.00  | SMAD family member 2                                                         |
| SMAD4    | 1.04  | SMAD family member 4                                                         |
| PLAUR    | 1.06  | Plasminogen activator, urokinase receptor                                    |
| TCF20    | 1.09  | Transcription factor 20                                                      |
| FAT1     | 1.11  | FAT tumor suppressor homolog 1                                               |
| CTSL1    | 1.14  | Cathepsin L1                                                                 |
| MGAT5    | 1.16  | Mannosyl (alpha-1,6-)-glycoprotein beta-1,6-N-acetyl-glucosaminyltransferase |
| EWSR1    | 1.16  | Ewing sarcoma breakpoint region 1                                            |
| SERPINE1 | 1.18  | Serpin peptidase inhibitor, clade E, member 1                                |
| PNN      | 1.22  | Pinin, desmosome associated protein                                          |
| METAP2   | 1.23  | Methionyl aminopeptidase 2                                                   |
| EPHB2    | 1.28  | EPH receptor B2                                                              |
| RPSA     | 1.30  | Ribosomal protein SA                                                         |
| KRAS     | 1.36  | V-Ki-ras2 Kirsten rat sarcoma viral oncogene homolog                         |
| TP53     | 1.38  | Tumor protein p53                                                            |
| CDKN2A   | 1.44  | Cyclin-dependent kinase inhibitor 2A                                         |
| HPSE     | 1.45  | Heparanase                                                                   |
| RORB     | 1.51  | RAR-related orphan receptor B                                                |
| SSTR2    | 1.51  | Somatostatin receptor 2                                                      |
| NME4     | 1.54  | Non-metastatic cells 4                                                       |
| CST7     | 1.63  | Cystatin F                                                                   |
| RB1      | 1.68  | Retinoblastoma 1                                                             |



|         |      |                                                       |
|---------|------|-------------------------------------------------------|
| BRMS1   | 1.72 | Breast cancer metastasis suppressor 1                 |
| CTNNA1  | 1.74 | Catenin (cadherin-associated protein), alpha 1        |
| HTATIP2 | 1.81 | HIV-1 Tat interactive protein 2                       |
| MTSS1   | 1.84 | Metastasis suppressor 1                               |
| NF2     | 1.88 | Neurofibromin 2                                       |
| TNFSF10 | 1.95 | Tumor necrosis factor (ligand) superfamily, member 10 |
| KISS1R  | 2.03 | KISS1 receptor                                        |
| TIMP4   | 2.05 | TIMP metalloproteinase inhibitor 4                    |
| NR4A3   | 2.29 | Nuclear receptor subfamily 4, group A, member 3       |
| FXRD5   | 2.34 | FXRD domain containing ion transport regulator 5      |
| NME1    | 2.39 | Non-metastatic cells 1                                |
| CDH1    | 2.69 | Cadherin 1, type 1, E-cadherin                        |
| GNRH1   | 2.77 | Gonadotropin-releasing hormone 1                      |
| KISS1   | 2.91 | KiSS-1 metastasis-suppressor                          |
| TIMP2   | 3.15 | TIMP metalloproteinase inhibitor 2                    |
| TIMP3   | 3.58 | TIMP metalloproteinase inhibitor 3                    |

#### **Cytokines & Chemokines PCR array**

|        |       |                                          |
|--------|-------|------------------------------------------|
| CXCL1  | -5.53 | Chemokine (C-X-C motif) ligand 1         |
| CXCL2  | -4.41 | Chemokine (C-X-C motif) ligand 2         |
| CXCL5  | -4.18 | Chemokine (C-X-C motif) ligand           |
| IL8    | -3.82 | Interleukin 8                            |
| CCL2   | -3.74 | Chemokine (C-C motif) ligand 2           |
| SPP1   | -3.52 | Secreted phosphoprotein 1                |
| VEGFA  | -3.41 | Vascular endothelial growth factor A     |
| CSF1   | -2.85 | Colony stimulating factor 1 (macrophage) |
| CCL18  | -2.64 | Chemokine (C-C motif) ligand 18          |
| BMP7   | -2.61 | Bone morphogenetic protein 7             |
| CCL1   | -2.51 | Chemokine (C-C motif) ligand 1           |
| IL1B   | -2.41 | Interleukin 1, beta                      |
| CXCL16 | -2.36 | Chemokine (C-X-C motif) ligand 16        |
| CCL17  | -2.15 | Chemokine (C-C motif) ligand 17          |
| CXCL10 | -2.07 | Chemokine (C-X-C motif) ligand 10        |
| IL18   | -2.04 | Interleukin 18                           |
| IL22   | -1.94 | Interleukin 22                           |
| CCL3   | -1.91 | Chemokine (C-C motif) ligand 3           |
| CXCL13 | -1.85 | Chemokine (C-X-C motif) ligand 13        |
| CXCL11 | -1.81 | Chemokine (C-X-C motif) ligand 11        |
| IL1A   | -1.74 | Interleukin 1, alpha                     |

|        |       |                                        |
|--------|-------|----------------------------------------|
| IL6    | -1.72 | Interleukin 6                          |
| IL10   | -1.67 | Interleukin 10                         |
| MIF    | -1.65 | Macrophage migration inhibitory factor |
| CCL7   | -1.62 | Chemokine (C-C motif) ligand 7         |
| IL4    | -1.57 | Interleukin 4                          |
| IL17A  | -1.52 | Interleukin 17A                        |
| CCL13  | -1.44 | Chemokine (C-C motif) ligand 13        |
| CCL5   | -1.41 | Chemokine (C-C motif) ligand 5         |
| BMP2   | -1.40 | Bone morphogenetic protein 2           |
| CXCL12 | -1.36 | Chemokine (C-X-C motif) ligand 12      |
| CCL22  | -1.31 | Chemokine (C-C motif) ligand 22        |
| CCL20  | -1.28 | Chemokine (C-C motif) ligand 20        |
| IL11   | -1.24 | Interleukin 11                         |
| BMP4   | -1.21 | Bone morphogenetic protein 4           |
| CD40LG | -1.20 | CD40 ligand                            |
| CCL11  | -1.18 | Chemokine (C-C motif) ligand 11        |
| CSF3   | -1.18 | Colony stimulating factor 3            |
| XCL1   | -1.16 | Chemokine (C motif) ligand             |
| LIF    | -1.13 | Leukemia inhibitory factor             |
| IL9    | -1.10 | Interleukin 9                          |
| CSF2   | -1.08 | Colony stimulating factor 2            |
| CD40LG | -1.07 | CD40 ligand                            |
| GPI    | -1.05 | Glucose-6-phosphate isomerase          |
| CNTF   | -1.03 | Ciliary neurotrophic factor            |
| LTA    | -1.01 | Lymphotoxin alpha                      |
| C5     | 1.00  | Complement component 5                 |
| IL5    | 1.05  | Interleukin 5                          |
| CCL21  | 1.07  | Chemokine (C-C motif) ligand 21        |
| LTB    | 1.09  | Lymphotoxin beta                       |
| CCL24  | 1.12  | Chemokine (C-C motif) ligand 24        |
| IL16   | 1.14  | Interleukin 16                         |
| IL17F  | 1.16  | Interleukin 17F                        |
| BMP6   | 1.21  | Bone morphogenetic protein 6           |
| CCL8   | 1.24  | Chemokine (C-C motif) ligand 8         |
| CX3CL1 | 1.26  | Chemokine (C-X3-C motif) ligand 1      |
| PPBP   | 1.29  | Pro-platelet basic protein             |
| TNF    | 1.31  | Tumor necrosis factor                  |
| CCL19  | 1.35  | Chemokine (C-C motif) ligand 19        |
| IL3    | 1.42  | Interleukin 3                          |

|           |      |                                                        |
|-----------|------|--------------------------------------------------------|
| MSTN      | 1.43 | Myostatin                                              |
| ADIPOQ    | 1.48 | Adiponectin, C1Q and collagen domain containing        |
| IL12A     | 1.55 | Interleukin 12A                                        |
| IL1RN     | 1.58 | Interleukin 1 receptor antagonist                      |
| IFNG      | 1.63 | Interferon, gamma                                      |
| IL23A     | 1.68 | Interleukin 23, alpha subunit p19                      |
| TNFSF10   | 1.72 | Tumor necrosis factor (ligand) superfamily, member 1   |
| FASLG     | 1.77 | Fas ligand                                             |
| OSM       | 1.82 | Oncostatin M                                           |
| TGFB2     | 1.86 | Transforming growth factor, beta 2                     |
| IFNA2     | 1.93 | Interferon, alpha 2                                    |
| IL12B     | 1.97 | Interleukin 12B                                        |
| IL13      | 2.02 | Interleukin 13                                         |
| TNFSF13B  | 2.02 | Tumor necrosis factor (ligand) superfamily, member 13b |
| TNFRSF11B | 2.09 | Tumor necrosis factor receptor superfamily, member 11b |
| TNFSF11   | 2.15 | Tumor necrosis factor (ligand) superfamily, member 11  |
| IL2       | 2.31 | Interleukin 2                                          |
| THPO      | 2.41 | Thrombopoietin                                         |
| IL15      | 2.49 | Interleukin 15                                         |
| NODAL     | 2.58 | Nodal homolog                                          |
| IL24      | 2.83 | Interleukin 24                                         |
| IL27      | 2.95 | Interleukin 27                                         |
| IL7       | 3.02 | Interleukin 7                                          |
| IL21      | 3.28 | Interleukin 21                                         |

---

Table S5. Correlation between CXCL1 expression and clinicopathological characteristics of HCCs in two independent cohorts of human HCC tissues

| Clinicopathological variables | Cohort I               |                     |                   | Cohort II              |                     |                   |        |
|-------------------------------|------------------------|---------------------|-------------------|------------------------|---------------------|-------------------|--------|
|                               | Tumor CXCL1 expression |                     | <i>P</i><br>Value | Tumor CXCL1 expression |                     | <i>P</i><br>Value |        |
|                               | Negative<br>(n=87)     | Positive<br>(n=133) |                   | Negative<br>(n=72)     | Positive<br>(n=118) |                   |        |
| Age                           | 53.89(11.801)          | 50.60(12.436)       | 0.385             | 51.75(7.925)           | 50.42(8.232)        | 0.608             |        |
| Sex                           | female                 | 17                  | 23                | 0.722                  | 11                  | 20                | 0.841  |
|                               | male                   | 70                  | 110               |                        | 61                  | 98                |        |
| Serum AFP                     | ≤20ng/ml               | 21                  | 28                | 0.621                  | 16                  | 27                | 1.000  |
|                               | >20ng/ml               | 66                  | 105               |                        | 56                  | 91                |        |
| Virus infection               | HBV                    | 68                  | 90                | 0.252                  | 58                  | 83                | 0.215  |
|                               | HCV                    | 7                   | 18                |                        | 4                   | 15                |        |
|                               | HBV+HCV                | 5                   | 6                 |                        | 4                   | 4                 |        |
|                               | none                   | 7                   | 19                |                        | 6                   | 16                |        |
| Cirrhosis                     | absent                 | 26                  | 33                | 0.439                  | 13                  | 29                | 0.368  |
|                               | present                | 61                  | 100               |                        | 59                  | 89                |        |
| Child-pugh score              | Class A                | 67                  | 98                | 0.635                  | 59                  | 99                | 0.842  |
|                               | Class B                | 20                  | 35                |                        | 13                  | 19                |        |
| Tumor number                  | single                 | 55                  | 66                | 0.053                  | 51                  | 63                | 0.022  |
|                               | multiple               | 32                  | 67                |                        | 21                  | 55                |        |
| Maximal tumor size            | ≤5cm                   | 37                  | 46                | 0.257                  | 49                  | 58                | 0.016  |
|                               | >5cm                   | 50                  | 87                |                        | 23                  | 60                |        |
| Tumor encapsulation           | absent                 | 29                  | 70                | 0.006                  | 15                  | 50                | 0.003  |
|                               | present                | 58                  | 63                |                        | 57                  | 68                |        |
| Microvascular invasion        | absent                 | 63                  | 58                | <0.001                 | 55                  | 48                | <0.001 |
|                               | present                | 24                  | 75                |                        | 17                  | 70                |        |
| Tumor differentiation         | I-II                   | 75                  | 96                | 0.020                  | 62                  | 71                | <0.001 |
|                               | III-IV                 | 12                  | 37                |                        | 10                  | 47                |        |
| TNM stage                     | I-II                   | 73                  | 81                | <0.001                 | 63                  | 74                | <0.001 |
|                               | III                    | 14                  | 52                |                        | 9                   | 44                |        |

Table S6. Correlation between CD11b expression and clinicopathological characteristics of HCCs in two independent cohorts of human HCC tissues

| Clinicopathological variables | Cohort I               |                    |                | Cohort II              |                    |                |         |
|-------------------------------|------------------------|--------------------|----------------|------------------------|--------------------|----------------|---------|
|                               | Tumor CD11b expression |                    | <i>P</i> Value | Tumor CD11b expression |                    | <i>P</i> Value |         |
|                               | Negative<br>(n=159)    | Positive<br>(n=61) |                | Negative<br>(n=137)    | Positive<br>(n=53) |                |         |
| Age                           | 51.86(12.232)          | 52.02(12.461)      | 0.672          | 50.55(8.413)           | 51.87(7.303)       | 0.446          |         |
| Sex                           | female                 | 30                 | 10             | 0.845                  | 25                 | 6              | 0.282   |
|                               | male                   | 129                | 51             |                        | 112                | 47             |         |
| Serum AFP                     | ≤20ng/ml               | 39                 | 10             | 0.211                  | 31                 | 12             | 1.000   |
|                               | >20ng/ml               | 120                | 51             |                        | 106                | 41             |         |
| Virus infection               | HBV                    | 117                | 41             | 0.677                  | 102                | 39             | 0.852   |
|                               | HCV                    | 16                 | 9              |                        | 13                 | 6              |         |
|                               | HBV+HCV                | 7                  | 4              |                        | 5                  | 3              |         |
|                               | none                   | 19                 | 7              |                        | 17                 | 5              |         |
| Cirrhosis                     | absent                 | 39                 | 20             | 0.236                  | 29                 | 13             | 0.697   |
|                               | present                | 120                | 41             |                        | 108                | 40             |         |
| Child-pugh score              | Class A                | 119                | 46             | 1.000                  | 114                | 44             | 1.000   |
|                               | Class B                | 40                 | 15             |                        | 23                 | 9              |         |
| Tumor number                  | single                 | 94                 | 27             | 0.051                  | 87                 | 27             | 0.138   |
|                               | multiple               | 65                 | 34             |                        | 50                 | 26             |         |
| Maximal tumor size            | ≤5cm                   | 66                 | 17             | 0.065                  | 90                 | 17             | <0.001  |
|                               | >5cm                   | 93                 | 44             |                        | 47                 | 36             |         |
| Tumor encapsulation           | absent                 | 60                 | 39             | 0.001                  | 39                 | 26             | 0.010   |
|                               | present                | 99                 | 22             |                        | 98                 | 27             |         |
| Microvascular invasion        | absent                 | 99                 | 22             | 0.001                  | 88                 | 15             | <0.001  |
|                               | present                | 60                 | 39             |                        | 49                 | 38             |         |
| Tumor differentiation         | I-II                   | 134                | 37             | <0.001                 | 110                | 23             | <0.001  |
|                               | III-IV                 | 25                 | 24             |                        | 27                 | 30             |         |
| TNM stage                     | I-II                   | 125                | 29             | <0.001*                | 113                | 24             | <0.001* |
|                               | III                    | 34                 | 32             |                        | 24                 | 29             |         |

Table S7. Correlation between FGF19 expression and clinicopathological characteristics of HCCs in two independent cohorts of human HCC tissues

| Clinicopathological variables | Cohort I               |                     |                | Cohort II              |                    |                |         |
|-------------------------------|------------------------|---------------------|----------------|------------------------|--------------------|----------------|---------|
|                               | Tumor FGF19 expression |                     | <i>P</i> Value | Tumor FGF19 expression |                    | <i>P</i> Value |         |
|                               | Negative<br>(n=109)    | Positive<br>(n=111) |                | Negative<br>(n=92)     | Positive<br>(n=98) |                |         |
| Age                           | 54.03(12.400)          | 49.81(11.823)       | 0.617          | 50.52(8.180)           | 51.30(8.091)       | 0.843          |         |
| Sex                           | female                 | 19                  | 21             | 0.862                  | 15                 | 16             | 1.000   |
|                               | male                   | 90                  | 90             |                        | 77                 | 82             |         |
| Serum AFP                     | ≤20ng/ml               | 26                  | 23             | 0.629                  | 19                 | 24             | 0.604   |
|                               | >20ng/ml               | 83                  | 88             |                        | 73                 | 74             |         |
| Virus infection               | HBV                    | 82                  | 76             | 0.053                  | 69                 | 72             | 0.951   |
|                               | HCV                    | 6                   | 19             |                        | 8                  | 11             |         |
|                               | HBV+HCV                | 6                   | 5              |                        | 4                  | 4              |         |
| Cirrhosis                     | none                   | 15                  | 11             |                        | 11                 | 11             |         |
|                               | absent                 | 26                  | 33             | 0.363                  | 15                 | 27             | 0.080   |
|                               | present                | 83                  | 78             |                        | 77                 | 71             |         |
| Child-pugh score              | Class A                | 85                  | 80             | 0.352                  | 77                 | 81             | 1.000   |
|                               | Class B                | 24                  | 31             |                        | 15                 | 17             |         |
| Tumor number                  | single                 | 63                  | 58             | 0.420                  | 58                 | 56             | 0.460   |
|                               | multiple               | 46                  | 53             |                        | 34                 | 42             |         |
| Maximal tumor size            | ≤5cm                   | 42                  | 41             | 0.889                  | 63                 | 44             | 0.001   |
|                               | >5cm                   | 67                  | 70             |                        | 29                 | 54             |         |
| Tumor encapsulation           | absent                 | 35                  | 64             | <0.001                 | 21                 | 44             | 0.002   |
|                               | present                | 74                  | 47             |                        | 71                 | 54             |         |
| Microvascular invasion        | absent                 | 74                  | 47             | <0.001                 | 65                 | 38             | <0.001  |
|                               | present                | 35                  | 64             |                        | 27                 | 60             |         |
| Tumor differentiation         | I-II                   | 94                  | 77             | 0.003                  | 77                 | 56             | <0.001  |
|                               | III-IV                 | 15                  | 34             |                        | 15                 | 42             |         |
| TNM stage                     | I-II                   | 88                  | 66             | 0.001*                 | 80                 | 57             | <0.001* |
|                               | III                    | 21                  | 45             |                        | 12                 | 41             |         |

Table S8. Correlation between FGFR4 expression and clinicopathological characteristics of HCCs in two independent cohorts of human HCC tissues

| Clinicopathological variables | Cohort I               |                     |                | Cohort II              |                     |                |         |
|-------------------------------|------------------------|---------------------|----------------|------------------------|---------------------|----------------|---------|
|                               | Tumor FGFR4 expression |                     | <i>P</i> Value | Tumor FGFR4 expression |                     | <i>P</i> Value |         |
|                               | Negative<br>(n=103)    | Positive<br>(n=117) |                | Negative<br>(n=90)     | Positive<br>(n=100) |                |         |
| Age                           | 53.21(12.238)          | 50.74(12.230)       | 0.963          | 51.20(8.672)           | 50.67(7.629)        | 0.266          |         |
| Sex                           | female                 | 18                  | 22             | 0.862                  | 11                  | 20             | 0.171   |
|                               | male                   | 85                  | 95             |                        | 79                  | 80             |         |
| Serum AFP                     | ≤20ng/ml               | 21                  | 28             | 0.627                  | 22                  | 21             | 0.606   |
|                               | >20ng/ml               | 82                  | 89             |                        | 68                  | 79             |         |
| Virus infection               | HBV                    | 77                  | 81             | 0.477                  | 69                  | 72             | 0.183   |
|                               | HCV                    | 10                  | 15             |                        | 6                   | 13             |         |
|                               | HBV+HCV                | 3                   | 8              |                        | 6                   | 2              |         |
|                               | none                   | 13                  | 13             |                        | 9                   | 13             |         |
| Cirrhosis                     | absent                 | 28                  | 31             | 1.000                  | 22                  | 20             | 0.488   |
|                               | present                | 75                  | 86             |                        | 68                  | 80             |         |
| Child-pugh score              | Class A                | 75                  | 90             | 0.534                  | 75                  | 83             | 1.000   |
|                               | Class B                | 28                  | 27             |                        | 15                  | 17             |         |
| Tumor number                  | single                 | 63                  | 58             | 0.103                  | 56                  | 58             | 0.657   |
|                               | multiple               | 40                  | 59             |                        | 34                  | 42             |         |
| Maximal tumor size            | ≤5cm                   | 43                  | 40             | 0.267                  | 64                  | 43             | <0.001  |
|                               | >5cm                   | 60                  | 77             |                        | 26                  | 57             |         |
| Tumor encapsulation           | absent                 | 35                  | 64             | 0.003                  | 22                  | 43             | 0.009   |
|                               | present                | 68                  | 53             |                        | 68                  | 57             |         |
| Microvascular invasion        | absent                 | 66                  | 55             | 0.014                  | 66                  | 37             | <0.001  |
|                               | present                | 37                  | 62             |                        | 24                  | 63             |         |
| Tumor differentiation         | I-II                   | 87                  | 84             | 0.034                  | 78                  | 55             | <0.001  |
|                               | III-IV                 | 16                  | 33             |                        | 12                  | 45             |         |
| TNM stage                     | I-II                   | 87                  | 67             | <0.001*                | 80                  | 57             | <0.001* |
|                               | III                    | 16                  | 50             |                        | 10                  | 43             |         |

Table S9. Primer sequences used in the study

| Primer name                                           | Primer sequences                        | Enzyme  |
|-------------------------------------------------------|-----------------------------------------|---------|
| Primers for real-time PCR:                            |                                         |         |
| HOXB5 sense:                                          | 5'- CGGCTACAATTACAATGGGATG-3'           |         |
| HOXB5 antisense:                                      | 5'- GGCCTCGTCTATTTTCGGTGA-3'            |         |
| FGFR4 sense:                                          | 5'- GAGGGGCCGCCTAGAGATT-3'              |         |
| FGFR4 antisense:                                      | 5'- CAGGACGATCATGGAGCCT-3'              |         |
| CXCL1 sense:                                          | 5'- AGAAGGTGTTGAGCGGGAAG-3'             |         |
| CXCL1 antisense:                                      | 5'- TGAGACGAGAAGGAGCATTGG-3'            |         |
| $\beta$ -actin sense:                                 | 5'-CATGTACGTTGCTATCCAGGC -3'            |         |
| $\beta$ -actin antisense:                             | 5'-CTCCTTAATGTCACGCACGAT -3'            |         |
| Primers for FGFR4 promoter construct:                 |                                         |         |
| (-1781/138bp) FGFR4 sense:                            | 5'- TATAGGTACCGGAGACCATTCTTTTCGCT -3'   | KpnI    |
| (-1335/+138bp) FGFR4 sense:                           | 5'- TATAGGTACCTGGCCACAGTCTAGATGC -3'    | KpnI    |
| (-765/+138bp) FGFR4 sense:                            | 5'- TATAGGTACCTCACAGTAGAGACGTCAT -3'    | KpnI    |
| (-186/+138) FGFR4 sense:                              | 5'- TATAGGTACCACCTCTCTCCGGCTCGAG-3'     | KpnI    |
| Antisense:                                            | 5'- ATATACGCGTAGCACAGGGTCCTGCTCA -3'    | MluI    |
| Primers for FGFR4 promoter site-directed mutagenesis: |                                         |         |
| HOXB5 binding site:                                   |                                         |         |
| binding site 6 mutation sense:                        | 5'-CTTGCCTGCGTAACgcgtAGAAAGGAAGTTGC-3'  |         |
| binding site 6 mutation antisense:                    | 5'-GCAACTTCCTTTCTacgcGTTACGCAGGCAAG-3'  |         |
| binding site 5 mutation sense:                        | 5'-GACACTTGAACCTCTgcgtGTGAGGTCTGAGGA-3' |         |
| binding site 5 mutation antisense:                    | 5'-TCCTCAGACCTCACagcAGAGTTCAAGTGTC-3'   |         |
| binding site 4 mutation sense:                        | 5'-CTACAGGCACCCGTagcgGTGCCCGGCCATTC-3'  |         |
| binding site 4 mutation antisense:                    | 5'-GAATGGCCGGGCACcgctACGGGTGCCTGTAG-3'  |         |
| binding site 3 mutation sense:                        | 5'-ACAGCTATTTACATgccgAACTGTTTCAGTTAC-3' |         |
| binding site 3 mutation antisense:                    | 5'-GTAAGTGAACAGTTcggcATGTAAATAGCTGT-3'  |         |
| binding site 2 mutation sense:                        | 5'-AACAGGTCTAAATgccgACAGCTAGTATTAC-3'   |         |
| binding site 2 mutation antisense:                    | 5'-GTAATACTAGCTGTggcATTTAGGACCTGTT-3'   |         |
| binding site 1 mutation sense:                        | 5'-CAGGAGGCGTGGGTgctGCAATCTATGTATA-3'   |         |
| binding site 1 mutation antisense:                    | 5'-TATACATAGATTGCagctACCCACGCCTCCTG-3'  |         |
| Primers used for ChIP in the FGFR4 promoter:          |                                         |         |
| distant region sense:                                 | 5'-GACGAGATCTCACTATGT-3'                |         |
| distant region antisense:                             | 5'-TTGCATAACTGTAAGGCC-3'                |         |
| binding site 1 sense:                                 | 5'-CTTCCTGAAGGAAGTGAG-3'                |         |
| binding site 1 antisense:                             | 5'-CACAAATCTGACTGTGTC-3'                |         |
| Primers for CXCL1 promoter construct:                 |                                         |         |
| (-1975/+268bp) CXCL1 sense:                           | 5'-TATACTCGAGCTGGAGTACATATACTAT-3'      | XhoI    |
| (-1482/+268bp) CXCL1 sense:                           | 5'-TATACTCGAGCTCATAACCACCTTGGGG-3'      | XhoI    |
| (-1051/+268bp) CXCL1 sense:                           | 5'-TATACTCGAGTGACTCTATGTGGGATCC-3'      | XhoI    |
| (-403/+268 bp) CXCL1 sense:                           | 5'-TATACTCGAGAAGAGGTCGCGCCTTCTC-3'      | XhoI    |
| Antisense:                                            | 5'-ATATAAGCTTGAAGAGACTCACTGACTG-3'      | HindIII |
| Primers for CXCL1 promoter site-directed mutagenesis: |                                         |         |
| HOXB5 binding site:                                   |                                         |         |



binding site 3 mutation sense: 5'-ACTAAGATTACTGTgcgaAGAGCACCAGTACC-3'  
 binding site 3 mutation antisense: 5'-GGTACTGGTGCTCTtcgcACAGTAATCTTAGT-3'  
 binding site 2 mutation sense: 5'-CCCTCTAAAAACCTcggatATGAATAAAAAATAA -3'  
 binding site 2 mutation antisense: 5'-TTATTTTTATTTCATaccgAGGTTTTTAGAGGG -3'  
 binding site 1 mutation sense: 5'-AGGAATGGTGAGCCtgggaAGCCTGCTGGACCC -3'  
 binding site 1 mutation antisense: 5'-GGGTCCAGCAGGCTtccaGGCTCACCATTCT -3'

Primers used for ChIP in the CXCL1 promoter:

distant region sense: 5'- TGAGCATATATTACA ACT -3'  
 distant region antisense: 5'- TGTGACTAGCTCATGCAT -3'  
 binding site 3 sense: 5'- GAAACAACATTCTAGCAC -3'  
 binding site 3 antisense: 5'- CAGCAGTATGAGTCTTGA -3'  
 binding site 2/1 sense: 5'- GGCAGAAGCCTCTGCTTT -3'  
 binding site 2/1 antisense: 5'- ACTGGTTGCTACTCCGGA -3'

Primers for HOXB5 promoter construct:

(-1460/+150bp) HOXB5 sense: 5'- TATAGGTACCATCCTGGCTAACACGATG -3' KpnI  
 (-962/+150bp) HOXB5 sense: 5'- TATAGGTACCCAGGTGACCTAGACAGCT -3' KpnI  
 (-444/+150bp) HOXB5 sense: 5'- TATAGGTACCGATCCTGCACTGATCTGG -3' KpnI  
 (-67/+150bp) HOXB5 sense: 5'- TATAGGTACCGGCTTCTGAATTGTCCTC-3' KpnI  
 antisense: 5'-TATAACGCGTTATCTGGCCGATCAGGTT-3' MluI

Primers for HOXB5 promoter site-directed mutagenesis:

HIF1 $\alpha$  binding site:

binding site 1 mutation sense: 5'-GGTCAACAAAAGCgtacGATTCCCTAACGC -3'  
 binding site 1 mutation antisense: 5'-GCGTTAGGGAATCgtacGCTTTTGTGACC -3'  
 binding site 2 mutation sense: 5'-TCTGTCACTCCCCggaCCTGGGCTAAGGA -3'  
 binding site 2 mutation antisense: 5'-TCCTTAGCCCAGGtccGGGGAGTGACAGA -3'  
 ATF2 binding site:  
 binding site mutation sense: 5'-GCATGAATTACCTCTTactaTCATCAGCGAGAATTTA-3'  
 binding site mutation antisense: 5'-TAAATTCTCGCTGATGAtagtAAGAGGTAATTCATGC-3'

Primers used for ChIP in the HOXB5 promoter:

distant region sense: 5'- AACTGCCTAGCTGCGAGT -3'  
 distant region antisense: 5'- AGCGGCCTAGTTGCCGAA -3'  
 binding site 1/2 sense: 5'- CAATTCGGAGACTTGCAA -3'  
 binding site 1/2 antisense: 5'- CGAAGTACAGTGCATCGC -3'

---

Table S10. Knockdown shRNA sequences used in this study

| shRNA genes   | Sequence                                                   |
|---------------|------------------------------------------------------------|
| shHOXB5-1     | CCGGAAGAAGGACAACAAATTGAACTCGAGTTCAATTTGTTGTCCTTCTTCTTTTTG  |
| shHOXB5-2     | CCGGCGGCTACAATTACAATGGGATCTCGAGATCCCATTGTAATTGTAGCCGTTTTT  |
| shHOXB5-3     | CCGGGCTTCACATCAGCCATGATATCTCGAGATATCATGGCTGATGTGAAGCTTTTT  |
| shHOXB5-mouse | CCGGGCTTCACATCAGCCACGATATCTCGAGATATCGTGGCTGATGTGAAGCTTTTTG |
| shFGFR4-human | CCGGCCCTCGAATAGGCACAGTTACCTCGAGGTAAGTGTGCCTATTCGAGGGTTTTTG |
| shFGFR4-mouse | CCGGGCTGTCTCTGAAGAGTACCTTCTCGAGAAGGTACTCTTCAGAGACAGCTTTTT  |
| shCXCL1-mouse | CCGGCAAACCGAAGTCATAGCCACACTCGAGTGTGGCTATGACTTCGGTTTGTTTTTG |

Table S11. The binding sites of HIF1  $\alpha$  and ATF2 in HOXB5 promoter

**HOXB5 promoter (-444bp ~ +150bp)**

AAGGCTCAACCCTGTGGCTGAGCCTTGGCCGGGTTTCTTTCTCTCCC GGCGACTGCAG  
GGAGCCTGCAGGGAGCCAGCAGGGAGGCAGCCGCCCGCCGCCATGGCGGTCT **CACGC**  
**HIF1 $\alpha$  binding site-2**  
CCGCGCTCCCGTCGGTCGCCGGGAGGTGGCGCGCTCTGCTCAGAGGCCAAAGCCAAC  
CTTCTCTCTGTTTCTCCCCCTTCTCCTTTTTTCCCCCTCTCTCGGAGGCTCGCATTGAAT  
CGGCCCTAACGATTCTCGGATCGTCATTATTTGTAACCATAGAGCATGAATTACCTCT**TG**  
**AGGTCAT**TCAGCGAGAATTACGACTGGTCAACAAAAGC**ACGTG**ATTCCCTAACGCCCC  
**ATF2 binding site** **HIF1 $\alpha$  binding site-1**  
CCACCCCCTTCCAACCCCCCCCCCATATTTGGCCGCATACATAGCAAACGAAGTACA  
GTGCATCGCTATAATTCATTAATACATCATAAATC**GT**GAAGCACAGGGTTATAACGACCA  
**Transcription starting region**  
CGATCCACAAATCAAGCCCTCCAAAATCACCCAAATGAGCTCGTACTTTGTAAACTCCT  
TCTCGGGGCGTTATCCAAATGGCCCGGACTATCAGTTGCTAAATTATGGCAGTGGCAGC  
TCTCTGA
